# Supplementary material for: Effect of diets supplemented with linseed alone or combined with vitamin E and selenium or with plant extracts, on Longissimus thoracis transcriptome in growing-finishing Italian Large White pigs
Source: J Anim Sci Biotechnol. 2018 Nov 20;9:81. doi: 10.1186/s40104-018-0297-2 (PMC6245756; doi:10.1186/s40104-018-0297-2)
Supplement: Supplementary file 3 — Complete list of differentially expressed genes in each diet comparison. (XLSX 146 kb) [file 40104_2018_297_MOESM3_ESM.xlsx]

## Sheet: All DEGs
Diet comparison	Locus	X_mean	Y_mean	FDR	log2FC	Symbol	NCBI	TranscriptID	Description	Ensembl
2vs1	gene15725	207.467	24.1271	0.0406097	3.10416	SPP1	XM_005667005	XM_005667005.3	secreted phosphoprotein 1, transcript variant X3	ENSSSCG00000009216
2vs1	gene3798	756.569	370.419	0.0249609	1.03031	DNAJB1	NM_001244430	NM_001244430.1	DnaJ heat shock protein family (Hsp40) member B1	ENSSSCG00000013784
2vs1	gene10577	831.739	430.011	0.0237074	0.951756	LOC110260979	XR_002344637	XR_002344637.1	uncharacterized LOC110260979
2vs1	gene2677	7413.85	3928.45	0.0165121	0.916261	LOC100513133	XR_115737	XR_115737.4	uncharacterized LOC100513133
2vs1	gene24339	11184.4	7693.98	2.19824e-14	0.539688	COL3A1	NM_001243297	NM_001243297.1	collagen type III alpha 1 chain	ENSSSCG00000016034
2vs1	gene26961	1905.46	1412.3	0.0251057	0.432095	TMSB4X	XM_005673406	XM_005673406.2	thymosin beta 4, X-linked, transcript variant X1	ENSSSCG00000012119
2vs1	gene3363	2129.82	2316.9	0.0491452	-0.121468	ARF1	XM_005661141	XM_005661141.3	ADP ribosylation factor 1, transcript variant X3	ENSSSCG00000013992
2vs1	gene18445	78746	86266.3	0.0444386	-0.13159	TPT1	NM_214373	NM_214373.1	tumor protein, translationally-controlled 1	ENSSSCG00000040929
2vs1	gene27455	14014.5	15398.1	0.0220222	-0.135834	PHKA1	XM_021080697	XM_021080697.1	phosphorylase kinase regulatory subunit alpha 1, transcript variant X7	ENSSSCG00000012411
2vs1	gene4820	7181.48	7895.98	0.0219015	-0.136837	VDAC1	XM_005652948	XM_005652948.3	voltage dependent anion channel 1, transcript variant X4	ENSSSCG00000014296
2vs1	gene19986	5082.21	5599.72	0.0222129	-0.139899	EIF5A	XM_021067817	XM_021067817.1	eukaryotic translation initiation factor 5A, transcript variant X4	ENSSSCG00000038359
2vs1	gene2492	78190.4	86188.1	0.0498243	-0.140498	TNNI2	NM_001032359	NM_001032359.1	troponin I2, fast skeletal type	ENSSSCG00000033260
2vs1	gene4348	2960.17	3265.13	0.0434534	-0.141459	RNF130	XM_021084321	XM_021084321.1	ring finger protein 130, transcript variant X2	ENSSSCG00000014013
2vs1	gene5545	186464	205712	0.0238182	-0.141729	MYLPF	NM_001006592	NM_001006592.1	myosin light chain, phosphorylatable, fast skeletal muscle	ENSSSCG00000007799
2vs1	gene21062	4841.86	5343.7	0.0431829	-0.142278	GYG1	XM_021069597	XM_021069597.1	glycogenin 1, transcript variant X2	ENSSSCG00000011698
2vs1	gene3315	17181.5	18988.9	0.0430409	-0.1443	EIF4G2	XM_021083319	XM_021083319.1	eukaryotic translation initiation factor 4 gamma 2	ENSSSCG00000013405
2vs1	gene19371	4779.39	5292.83	0.0334211	-0.147211	RPL19	XM_003131509	XM_003131509.5	ribosomal protein L19	ENSSSCG00000017509
2vs1	gene10576	26042.4	28845.8	0.0431427	-0.147499	GPI	NM_214330	NM_214330.1	glucose-6-phosphate isomerase	ENSSSCG00000002873
2vs1	gene22503	12935.1	14331.5	0.0320293	-0.147906	RPLP0	NM_001098598	NM_001098598.1	ribosomal protein lateral stalk subunit P0	ENSSSCG00000036014
2vs1	gene9877	5785.57	6433.2	0.0442672	-0.153078	SLC25A3	NM_001164512	NM_001164512.2	solute carrier family 25 member 3	ENSSSCG00000000886
2vs1	gene24547	1292.33	1437.48	0.046564	-0.153562	ARPC2	NM_001190239	NM_001190239.1	actin related protein 2/3 complex subunit 2	ENSSSCG00000016185
2vs1	gene3665	6808.5	7587.28	0.0453407	-0.156246	TMEM38A	XM_021083580	XM_021083580.1	transmembrane protein 38A	ENSSSCG00000013864
2vs1	gene2228	3248.8	3621.41	0.0487732	-0.156645	RPL35	NM_214326	NM_214326.2	ribosomal protein L35	ENSSSCG00000034227
2vs1	gene20010	2252.49	2510.94	0.0439129	-0.156708	FXR2	XM_003131974	XM_003131974.5	FMR1 autosomal homolog 2	ENSSSCG00000017953
2vs1	gene3538	8034.66	8962.83	0.0267809	-0.157718	RACK1	NM_214332	NM_214332.1	receptor for activated C kinase 1	ENSSSCG00000029724
2vs1	gene20905	2876.86	3216.43	0.0436671	-0.160968	RAB7A	XM_021069433	XM_021069433.1	RAB7A, member RAS oncogene family, transcript variant X2	ENSSSCG00000011615
2vs1	gene1839	4729.05	5294.06	0.0208406	-0.162825	VCP	XM_021083237	XM_021083237.1	valosin containing protein, transcript variant X1
2vs1	gene4445	2552.78	2858.16	0.0358381	-0.163021	BTF3	XM_005661479	XM_005661479.3	basic transcription factor 3, transcript variant X1	ENSSSCG00000014071
2vs1	gene17069	3437.96	3849.55	0.0438196	-0.163134	BZW2	XM_021102039	XM_021102039.1	basic leucine zipper and W2 domains 2, transcript variant X2	ENSSSCG00000023118
2vs1	gene8697	8235.95	9231.69	0.044342	-0.164659	ACO2	NM_213954	NM_213954.1	aconitase 2	ENSSSCG00000000064
2vs1	gene9154	14505	16276.1	0.0438403	-0.166199	ATP5B	XM_001929410	XM_001929410.5	ATP synthase, H+ transporting, mitochondrial F1 complex, beta polypeptide	ENSSSCG00000000405
2vs1	gene11028	6463.47	7268.33	0.0432322	-0.169314	GYS1	NM_001195508	NM_001195508.1	glycogen synthase 1	ENSSSCG00000003154
2vs1	gene5911	15196.9	17089.5	0.00551184	-0.169333	RPS2	XM_021086796	XM_021086796.1	ribosomal protein S2	ENSSSCG00000033697
2vs1	gene24998	1389.32	1562.34	0.0446147	-0.169336	PAIP1	XM_005657616	XM_005657616.3	poly(A) binding protein interacting protein 1, transcript variant X3	ENSSSCG00000016874
2vs1	gene7870	1848.45	2080.49	0.0394977	-0.170608	HDGF	XM_013996955	XM_013996955.2	heparin binding growth factor, transcript variant X1	ENSSSCG00000006468
2vs1	gene5801	13882.9	15626	0.0260369	-0.170636	SRL	XM_021086705	XM_021086705.1	sarcalumenin, transcript variant X5	ENSSSCG00000007949
2vs1	gene23007	3717.87	4186.17	0.0285825	-0.171155	PSAP	XM_021071890	XM_021071890.1	prosaposin, transcript variant X6	ENSSSCG00000010281
2vs1	gene23906	21914.3	24716.2	0.0199568	-0.173586	MYOM2	XM_021075902	XM_021075902.1	myomesin 2	ENSSSCG00000015747
2vs1	gene6325	1551.48	1750.22	0.044648	-0.173893	CCT7	NM_001170522	NM_001170522.1	chaperonin containing TCP1 subunit 7	ENSSSCG00000008303
2vs1	gene2269	14133.3	15945	0.0209441	-0.173998	AK1	XM_003122177	XM_003122177.6	adenylate kinase 1, transcript variant X1	ENSSSCG00000005627
2vs1	gene26799	2073.81	2343.59	0.045668	-0.176434	UBE2D4	XM_003134861	XM_003134861.6	ubiquitin conjugating enzyme E2 D4 (putative), transcript variant X1	ENSSSCG00000016722;ENSSSCG00000036481
2vs1	gene20389	3818.83	4316.71	0.0276307	-0.176803	RPSA	NM_001037146	NM_001037146.2	ribosomal protein SA	ENSSSCG00000037236
2vs1	gene821	205322	232302	0.0275055	-0.178109	TPM1	XM_005659518	XM_005659518.3	tropomyosin 1 (alpha), transcript variant X7	ENSSSCG00000004570
2vs1	gene20143	10680.2	12094.6	0.0456339	-0.179422	UBB	XM_005653994	XM_005653994.3	ubiquitin B, transcript variant X1
2vs1	gene8900	17235.2	19538.3	0.0240281	-0.180949	GPD1	XM_021090918	XM_021090918.1	glycerol-3-phosphate dehydrogenase 1, transcript variant X1	ENSSSCG00000000214
2vs1	gene12145	15317.9	17369.7	0.0448874	-0.181358	MYOM1	XM_005665300	XM_005665300.3	myomesin 1, transcript variant X1	ENSSSCG00000003693
2vs1	gene2802	10870.1	12338.4	0.0290526	-0.182787	EEF1G	XM_005660798	XM_005660798.3	eukaryotic translation elongation factor 1 gamma	ENSSSCG00000013064
2vs1	gene19806	4488.65	5096.36	0.0195218	-0.183185	YWHAE	XM_021067551	XM_021067551.1	tyrosine 3-monooxygenase/tryptophan 5-monooxygenase activation protein epsilon, transcript variant X1	ENSSSCG00000038989
2vs1	gene17939	5067.22	5757.2	0.047094	-0.184171	SVIL	XM_021064788	XM_021064788.1	supervillin, transcript variant X45	ENSSSCG00000011022
2vs1	gene10911	2386.34	2712.02	0.0438458	-0.18457	RTN2	NM_001129960	NM_001129960.1	reticulon 2	ENSSSCG00000036870
2vs1	gene19981	2253.74	2561.52	0.0306895	-0.184682	GABARAP	NM_001190288	NM_001190288.1	GABA type A receptor-associated protein
2vs1	gene8063	13870	15764.9	0.0218832	-0.18475	TMOD4	XM_005663458	XM_005663458.3	tropomodulin 4, transcript variant X1	ENSSSCG00000006631
2vs1	gene20463	2848.62	3238.38	0.0235595	-0.185005	FYCO1	XM_021068193	XM_021068193.1	FYVE and coiled-coil domain containing 1, transcript variant X1	ENSSSCG00000011317
2vs1	gene2811	8541.78	9716.27	0.0273977	-0.185866	FTH1	XM_005660803	XM_005660803.3	ferritin heavy chain 1, transcript variant X1	ENSSSCG00000014540
2vs1	gene15821	1762.73	2006.26	0.0437692	-0.186697	IPO7	XM_013979065	XM_013979065.2	importin 7, transcript variant X1	ENSSSCG00000028886
2vs1	gene4193	23802.8	27101.5	0.013565	-0.187243	EEF2	XM_003354002	XM_003354002.5	eukaryotic translation elongation factor 2, transcript variant X1	ENSSSCG00000025675
2vs1	gene2791	1808.23	2060.34	0.0437938	-0.188302	UBXN1	XM_005660790	XM_005660790.3	UBX domain protein 1, transcript variant X2	ENSSSCG00000023110
2vs1	gene2392	7120.18	8114.04	0.0256453	-0.188507	RPL7A	XM_021071136	XM_021071136.1	ribosomal protein L7a
2vs1	gene21494	1746.04	1991.05	0.0435487	-0.189438	KPNA1	NM_001163405	NM_001163405.1	karyopherin subunit alpha 1	ENSSSCG00000028475
2vs1	gene11720	2041.37	2328.96	0.0435735	-0.19015	CAPZB	NM_001113444	NM_001113444.1	capping actin protein of muscle Z-line beta subunit	ENSSSCG00000003493
2vs1	gene6965	1241.59	1417	0.0333716	-0.190649	PUF60	XM_021090445	XM_021090445.1	poly(U) binding splicing factor 60, transcript variant X10	ENSSSCG00000038800
2vs1	gene13891	2264.55	2584.97	0.0367929	-0.190921	LOC100156967	XM_005666147	XM_005666147.2	cytochrome c oxidase subunit 5A, mitochondrial	ENSSSCG00000024316
2vs1	gene19418	3411.16	3894.9	0.042647	-0.191322	NFE2L1	XM_021067094	XM_021067094.1	nuclear factor, erythroid 2 like 1, transcript variant X2	ENSSSCG00000017525
2vs1	gene2646	2673.9	3055.18	0.00662005	-0.19231	BANF1	XM_005660673	XM_005660673.3	barrier to autointegration factor 1, transcript variant X1	ENSSSCG00000012961
2vs1	gene20860	1994.76	2279.24	0.030034	-0.192341	CAND2	XM_021069357	XM_021069357.1	cullin associated and neddylation dissociated 2 (putative), transcript variant X1	ENSSSCG00000011582
2vs1	gene21314	2856.84	3265.52	0.0284966	-0.192893	PSMD2	NM_001243477	NM_001243477.1	proteasome 26S subunit, non-ATPase 2	ENSSSCG00000023998
2vs1	gene3985	1979.81	2264.44	0.0279154	-0.193794	EIF3G	XM_021083783	XM_021083783.1	eukaryotic translation initiation factor 3 subunit G	ENSSSCG00000013661;ENSSSCG00000024072
2vs1	gene6746	2672.65	3059.17	0.0456993	-0.19487	HADHA	NM_213962	NM_213962.2	hydroxyacyl-CoA dehydrogenase/3-ketoacyl-CoA thiolase/enoyl-CoA hydratase (trifunctional protein), alpha subunit	ENSSSCG00000008571
2vs1	gene11570	2480.14	2839.27	0.0172569	-0.195094	PARK7	NM_001078663	NM_001078663.1	Parkinsonism associated deglycase	ENSSSCG00000003385
2vs1	gene3067	3577.89	4096.45	0.0438203	-0.195264	PACSIN3	XM_021085228	XM_021085228.1	protein kinase C and casein kinase substrate in neurons 3, transcript variant X10	ENSSSCG00000013244
2vs1	gene18004	2290.92	2623.12	0.0416694	-0.195352	OPTN	XM_005656827	XM_005656827.3	optineurin, transcript variant X1	ENSSSCG00000023247
2vs1	gene10903	395076	452507	0.0209085	-0.195809	CKM	XM_021093542	XM_021093542.1	creatine kinase, M-type, transcript variant X2	ENSSSCG00000036132
2vs1	gene18808	1247.3	1429.17	0.0479619	-0.196366	P4HB	XM_021066427	XM_021066427.1	prolyl 4-hydroxylase subunit beta	ENSSSCG00000039148
2vs1	gene6261	4358.23	4994.52	0.0244812	-0.196606	SUCLG1	XM_005655225	XM_005655225.2	succinate-CoA ligase alpha subunit, transcript variant X2	ENSSSCG00000008247
2vs1	gene4897	1159.92	1329.38	0.0448341	-0.196732	ETF1	XM_003123975	XM_003123975.6	eukaryotic translation termination factor 1, transcript variant X1	ENSSSCG00000014337
2vs1	gene24761	2022.38	2318.14	0.01996	-0.196918	LRRFIP1	XM_021075506	XM_021075506.1	LRR binding FLII interacting protein 1, transcript variant X42	ENSSSCG00000016330
2vs1	gene2685	1265.88	1451.85	0.044591	-0.197752	CAPN1	NM_001348784	NM_001348784.1	calpain 1
2vs1	gene20534	3158.22	3622.85	0.026679	-0.198016	ARIH2	XM_003132197	XM_003132197.6	ariadne RBR E3 ubiquitin protein ligase 2, transcript variant X1	ENSSSCG00000011367
2vs1	gene23031	3488.06	4001.35	0.0282911	-0.198061	PPP3CB	XM_021072583	XM_021072583.1	protein phosphatase 3 catalytic subunit beta, transcript variant X10	ENSSSCG00000010301
2vs1	gene3059	1830.3	2099.67	0.0344515	-0.198081	PSMC3	XM_003122809	XM_003122809.3	proteasome 26S subunit, ATPase 3, transcript variant X1
2vs1	gene26826	4356.69	4998.73	0.0225402	-0.19833	OGDH	XM_021079061	XM_021079061.1	oxoglutarate dehydrogenase, transcript variant X5	ENSSSCG00000016743
2vs1	gene21315	4614.79	5297.09	0.00123663	-0.198936	EIF4G1	XM_005670029	XM_005670029.3	eukaryotic translation initiation factor 4 gamma 1, transcript variant X7	ENSSSCG00000030255
2vs1	gene24291	184899	212238	0.0432994	-0.198942	TTN	XM_021075901	XM_021075901.1	titin
2vs1	gene11635	1790.51	2057.97	0.0440216	-0.20085	MFN2	XM_021095349	XM_021095349.1	mitofusin 2, transcript variant X2	ENSSSCG00000003434
2vs1	gene5089	4867.68	5594.89	0.0406361	-0.200877	CAMK2A	XM_021085017	XM_021085017.1	calcium/calmodulin dependent protein kinase II alpha, transcript variant X1	ENSSSCG00000014443
2vs1	gene7611	6422.24	7383.74	0.000115225	-0.201275	DCAF6	XM_021089469	XM_021089469.1	DDB1 and CUL4 associated factor 6, transcript variant X19	ENSSSCG00000006303
2vs1	gene12412	1762.62	2026.62	0.0308165	-0.201355	JAK1	XM_021093532	XM_021093532.1	Janus kinase 1, transcript variant X6	ENSSSCG00000003809
2vs1	gene8243	15631.9	17976.3	0.0255901	-0.201606	CSDE1	XM_003481484	XM_003481484.4	cold shock domain containing E1, transcript variant X1	ENSSSCG00000006752
2vs1	gene4531	2623.11	3016.77	0.0203618	-0.201729	RPS23	NM_213764	NM_213764.1	ribosomal protein S23	ENSSSCG00000014133
2vs1	gene25498	8120.88	9340.01	0.0207808	-0.201788	ANK1	XM_021078313	XM_021078313.1	ankyrin 1	ENSSSCG00000007022
2vs1	gene10968	862.535	992.279	0.0467468	-0.202163	NAPA	NM_001244384	NM_001244384.1	NSF attachment protein alpha	ENSSSCG00000003120
2vs1	gene13568	1448.9	1667.59	0.0410081	-0.2028	KLHDC3	XM_021097859	XM_021097859.1	kelch domain containing 3, transcript variant X4	ENSSSCG00000022901
2vs1	gene11436	2562.97	2950.01	0.0268902	-0.202903	RPS5	XM_003128133	XM_003128133.4	ribosomal protein S5	ENSSSCG00000004002
2vs1	gene7889	1425.8	1641.19	0.045676	-0.202974	CCT3	NM_001244180	NM_001244180.1	chaperonin containing TCP1 subunit 3	ENSSSCG00000006487
2vs1	gene17290	1200.12	1382.1	0.0443556	-0.203691	PIGC	XM_005667778	XM_005667778.3	phosphatidylinositol glycan anchor biosynthesis class C, transcript variant X1	ENSSSCG00000015486
2vs1	gene27337	2036.74	2347.64	0.0448403	-0.204951	HUWE1	XM_013986152	XM_013986152.2	HECT, UBA and WWE domain containing 1, E3 ubiquitin protein ligase, transcript variant X1	ENSSSCG00000012328
2vs1	gene3054	1190.62	1372.49	0.043225	-0.205088	NDUFS3	NM_001243796	NM_001243796.1	NADH:ubiquinone oxidoreductase core subunit S3	ENSSSCG00000032081
2vs1	gene17300	1379.78	1591.05	0.0458857	-0.205536	PRDX6	NM_214408	NM_214408.1	peroxiredoxin 6	ENSSSCG00000022742
2vs1	gene22845	1349.84	1557.15	0.0434748	-0.206127	EGLN1	XM_021073581	XM_021073581.1	egl-9 family hypoxia inducible factor 1, transcript variant X2	ENSSSCG00000010172
2vs1	gene8540	1739.89	2007.13	0.0281732	-0.206141	SH3GLB1	XM_013997434	XM_013997434.2	SH3 domain containing GRB2 like, endophilin B1, transcript variant X5	ENSSSCG00000006930
2vs1	gene25316	1241.26	1433.29	0.0447498	-0.207529	LARP1	XM_021076708	XM_021076708.1	La ribonucleoprotein domain family member 1	ENSSSCG00000017069
2vs1	gene11054	1131.84	1307.5	0.0368257	-0.208142	FCGRT	XM_013998637	XM_013998637.2	Fc fragment of IgG receptor and transporter, transcript variant X4	ENSSSCG00000003187
2vs1	gene7353	3912.95	4520.52	0.0262144	-0.208234	WWP1	XM_013996633	XM_013996633.2	WW domain containing E3 ubiquitin protein ligase 1, transcript variant X11	ENSSSCG00000006137
2vs1	gene6976	2666.3	3081.38	0.0443461	-0.208741	EEF1D	XM_021090459	XM_021090459.1	eukaryotic translation elongation factor 1 delta, transcript variant X2	ENSSSCG00000006954
2vs1	gene8957	5249.48	6067.88	0.0199398	-0.209019	EIF4B	XR_002343952	XR_002343952.1	eukaryotic translation initiation factor 4B, transcript variant X2	ENSSSCG00000032028
2vs1	gene19191	1224.82	1415.79	0.0469354	-0.209037	ASB16	XM_021066898	XM_021066898.1	ankyrin repeat and SOCS box containing 16	ENSSSCG00000039673
2vs1	gene12055	3355.46	3879.17	0.0283774	-0.209236	PABPC4	XM_013999193	XM_013999193.2	poly(A) binding protein cytoplasmic 4, transcript variant X11	ENSSSCG00000003660
2vs1	gene3839	2337.67	2703.11	0.0207145	-0.209545	RAD23A	XM_005652877	XM_005652877.2	RAD23 homolog A, nucleotide excision repair protein, transcript variant X2	ENSSSCG00000013747
2vs1	gene13769	6650.75	7691.06	0.0455106	-0.209665	ALPK3	XM_021098900	XM_021098900.1	alpha kinase 3
2vs1	gene22731	1723.46	1993.85	0.0204615	-0.210254	CRKL	XM_003132994	XM_003132994.4	CRK like proto-oncogene, adaptor protein	ENSSSCG00000010095
2vs1	gene15910	846.716	979.741	0.0461499	-0.210522	ILK	XM_005656596	XM_005656596.3	integrin linked kinase, transcript variant X4
2vs1	gene17879	1033.78	1196.68	0.0321278	-0.211106	BAG1	XM_013980186	XM_013980186.2	BCL2 associated athanogene 1, transcript variant X2	ENSSSCG00000010996
2vs1	gene14635	7832.42	9066.62	0.0269829	-0.211107	ASB2	XM_021099651	XM_021099651.1	ankyrin repeat and SOCS box containing 2, transcript variant X1	ENSSSCG00000002467
2vs1	gene6360	3564.94	4127.12	0.0120327	-0.211257	PCBP1	XM_003125057	XM_003125057.4	poly(rC) binding protein 1	ENSSSCG00000027224
2vs1	gene1663	787.858	912.234	0.0490053	-0.211467	RRAGA	XM_005660087	XM_005660087.3	Ras related GTP binding A
2vs1	gene3631	2330.57	2699.07	0.0202144	-0.211783	RPL18A	XM_021083534	XM_021083534.1	ribosomal protein L18a, transcript variant X4	ENSSSCG00000013889
2vs1	gene13428	6562.29	7601.72	0.028859	-0.212127	C7H6orf106	NM_001243026	NM_001243026.1	chromosome 7 C6orf106 homolog	ENSSSCG00000001527
2vs1	gene10347	6662.29	7717.59	0.0251955	-0.212133	GOT2	NM_213928	NM_213928.1	glutamic-oxaloacetic transaminase 2	ENSSSCG00000032985
2vs1	gene19821	1688.31	1956.15	0.0283444	-0.212438	SERPINF1	XM_021066264	XM_021066264.1	serpin family F member 1, transcript variant X1	ENSSSCG00000017818
2vs1	gene10178	4214.07	4882.75	0.00311842	-0.212478	KARS	XM_003126856	XM_003126856.3	lysyl-tRNA synthetase, transcript variant X2	ENSSSCG00000002704
2vs1	gene24423	3277.83	3798.06	0.0266805	-0.212522	STRADB	XM_003133587	XM_003133587.5	STE20-related kinase adaptor beta, transcript variant X1
2vs1	gene5913	852.476	988.122	0.0465555	-0.213029	NDUFB10	XM_021086798	XM_021086798.1	NADH:ubiquinone oxidoreductase subunit B10	ENSSSCG00000030328
2vs1	gene6916	5047.94	5851.54	0.0159265	-0.213121	RPL8	XM_005655297	XM_005655297.3	ribosomal protein L8	ENSSSCG00000029830
2vs1	gene3602	3728.35	4322.73	0.0249896	-0.213404	UBA52	XM_005652916	XM_005652916.3	ubiquitin A-52 residue ribosomal protein fusion product 1, transcript variant X2
2vs1	gene15560	1102.7	1278.7	0.0473965	-0.213638	ANK2	XM_021100703	XM_021100703.1	ankyrin 2	ENSSSCG00000009125
2vs1	gene4352	4789.21	5556.89	0.0208959	-0.214492	SQSTM1	XM_003123639	XM_003123639.4	sequestosome 1, transcript variant X1
2vs1	gene3604	2077.04	2411.02	0.0239702	-0.215118	FKBP8	XM_003123516	XM_003123516.4	FK506 binding protein 8, transcript variant X1	ENSSSCG00000013905
2vs1	gene19905	849.766	987.113	0.0433191	-0.21615	MYBBP1A	XM_005669133	XM_005669133.3	MYB binding protein 1a, transcript variant X2	ENSSSCG00000017882
2vs1	gene17774	1760.17	2044.69	0.0332611	-0.216171	CYB5R1	XM_005668009	XM_005668009.2	cytochrome b5 reductase 1, transcript variant X1	ENSSSCG00000010929
2vs1	gene20207	899.388	1045.01	0.043254	-0.216499	COPS3	XM_021066089	XM_021066089.1	COP9 signalosome subunit 3, transcript variant X3	ENSSSCG00000018051;ENSSSCG00000038715
2vs1	gene25806	1961.82	2280.4	0.0267497	-0.217095	SNTA1	XM_003359945	XM_003359945.5	syntrophin alpha 1
2vs1	gene1017	26307	30585.3	0.0324647	-0.217389	ZNF106	XM_021097187	XM_021097187.1	zinc finger protein 106, transcript variant X2	ENSSSCG00000004725
2vs1	gene26534	756.759	880.004	0.0438812	-0.217676	TNPO3	XM_013990808	XM_013990808.2	transportin 3, transcript variant X1	ENSSSCG00000016572
2vs1	gene25707	744.449	866.207	0.0434456	-0.21854	SNRPB	XR_002339920	XR_002339920.1	small nuclear ribonucleoprotein polypeptides B and B1, transcript variant X2
2vs1	gene17582	1062.63	1237.16	0.0445516	-0.219399	RAB3GAP2	XM_003130506	XM_003130506.5	RAB3 GTPase activating non-catalytic protein subunit 2, transcript variant X2	ENSSSCG00000010824
2vs1	gene24665	2469.65	2875.34	0.0104092	-0.219424	TRIP12	XM_021075059	XM_021075059.1	thyroid hormone receptor interactor 12, transcript variant X3	ENSSSCG00000024373
2vs1	gene11690	1772.25	2064.26	0.0267632	-0.220044	SZRD1	XM_005665044	XM_005665044.3	SUZ RNA binding domain containing 1	ENSSSCG00000031083
2vs1	gene8810	931.002	1084.56	0.0331394	-0.220257	EIF3D	NM_001244723	NM_001244723.1	eukaryotic translation initiation factor 3 subunit D	ENSSSCG00000000141
2vs1	gene257	1162.69	1354.56	0.037984	-0.220362	HBS1L	XM_021087600	XM_021087600.1	HBS1 like translational GTPase, transcript variant X2	ENSSSCG00000004169
2vs1	gene19085	1383.42	1611.88	0.030056	-0.220501	TEX2	XM_021066767	XM_021066767.1	testis expressed 2	ENSSSCG00000017278
2vs1	gene4291	2308.45	2689.82	0.0120374	-0.220587	ATP5D	XM_003122991	XM_003122991.5	ATP synthase, H+ transporting, mitochondrial F1 complex, delta subunit
2vs1	gene17376	8522.41	9935.86	0.0434049	-0.221385	GLUL	XM_021102200	XM_021102200.1	glutamate-ammonia ligase, transcript variant X1	ENSSSCG00000015545
2vs1	gene2316	6576.07	7675.93	0.019983	-0.223116	CRAT	XM_005660485	XM_005660485.3	carnitine O-acetyltransferase, transcript variant X1
2vs1	gene14584	881.011	1029.04	0.04846	-0.224061	PTPN21	XM_003356769	XM_003356769.4	protein tyrosine phosphatase, non-receptor type 21	ENSSSCG00000002425
2vs1	gene24819	2101.51	2454.98	0.0223013	-0.224279	HDLBP	XM_021075261	XM_021075261.1	high density lipoprotein binding protein, transcript variant X6	ENSSSCG00000016379
2vs1	gene9583	1065.09	1244.73	0.0473963	-0.22486	EMG1	NM_001243478	NM_001243478.1	EMG1, N1-specific pseudouridine methyltransferase	ENSSSCG00000026812
2vs1	gene24587	3888.34	4545.56	0.0446968	-0.225304	TUBA4A	XM_001928335	XM_001928335.6	tubulin alpha 4a
2vs1	gene19097	2339.88	2736.18	0.023467	-0.225727	PSMC5	XM_021066210	XM_021066210.1	proteasome 26S subunit, ATPase 5, transcript variant X3	ENSSSCG00000017287
2vs1	gene5571	290402	339622	3.85807e-05	-0.225881	ALDOA	XM_021087997	XM_021087997.1	aldolase, fructose-bisphosphate A, transcript variant X3
2vs1	gene2469	1892.5	2213.38	0.0224302	-0.225959	RPLP2	NM_001244866	NM_001244866.1	ribosomal protein lateral stalk subunit P2	ENSSSCG00000012842
2vs1	gene25938	4099.33	4794.49	0.0277397	-0.225989	JPH2	XM_021077520	XM_021077520.1	junctophilin 2	ENSSSCG00000007369
2vs1	gene18142	1368.44	1600.61	0.0291097	-0.22609	GDI2	NM_001001643	NM_001001643.1	GDP dissociation inhibitor 2	ENSSSCG00000011137
2vs1	gene19948	1401.11	1639.42	0.0419915	-0.226614	PSMB6	XM_021066255	XM_021066255.1	proteasome subunit beta 6, transcript variant X1	ENSSSCG00000017913
2vs1	gene20857	3191.72	3735.28	0.00192294	-0.226879	RAF1	XM_021069350	XM_021069350.1	Raf-1 proto-oncogene, serine/threonine kinase, transcript variant X4	ENSSSCG00000024453
2vs1	gene11778	2677.04	3133.77	0.0284135	-0.22726	TCEA3	XM_021095523	XM_021095523.1	transcription elongation factor A3, transcript variant X1	ENSSSCG00000032674
2vs1	gene9593	47474.6	55577.6	0.0144529	-0.227347	TPI1	NM_001037151	NM_001037151.1	triosephosphate isomerase 1
2vs1	gene5480	1964.85	2300.65	0.0312683	-0.227621	PHKG1	NM_001293144	NM_001293144.1	phosphorylase kinase catalytic subunit gamma 1	ENSSSCG00000007744
2vs1	gene16790	1908.28	2235.66	0.0282301	-0.228434	SRPRA	XM_003130057	XM_003130057.5	SRP receptor alpha subunit, transcript variant X2	ENSSSCG00000015227
2vs1	gene9669	1746.79	2047.12	0.0280056	-0.228894	FKBP4	NM_001195337	NM_001195337.2	FK506 binding protein 4	ENSSSCG00000000743
2vs1	gene4405	977.012	1145.2	0.0436836	-0.22915	NSD1	XM_003123667	XM_003123667.6	nuclear receptor binding SET domain protein 1, transcript variant X1	ENSSSCG00000014044
2vs1	gene13242	1065.16	1248.56	0.0360227	-0.22919	FLOT1	XM_005665748	XM_005665748.3	flotillin 1, transcript variant X1	ENSSSCG00000022725
2vs1	gene11578	1477.39	1732.25	0.0486491	-0.229592	ENO1	XM_021095279	XM_021095279.1	enolase 1, transcript variant X2	ENSSSCG00000022343
2vs1	gene22129	1103.14	1293.6	0.0470886	-0.22977	PPP3CC	XM_005657236	XM_005657236.3	protein phosphatase 3 catalytic subunit gamma, transcript variant X4	ENSSSCG00000032622
2vs1	gene2993	937.71	1099.74	0.0439499	-0.229951	SSRP1	XM_003353864	XM_003353864.4	structure specific recognition protein 1, transcript variant X2	ENSSSCG00000029059
2vs1	gene5209	737.399	865.349	0.0465576	-0.230837	LOC110260073	XM_021087965	XM_021087965.1	alpha-2C adrenergic receptor-like	ENSSSCG00000032626
2vs1	gene4034	1025.8	1203.9	0.0457671	-0.230962	ECSIT	XM_013987374	XM_013987374.2	ECSIT signalling integrator, transcript variant X2
2vs1	gene5005	1344.01	1578.7	0.0203135	-0.232198	RNF14	XM_021084946	XM_021084946.1	ring finger protein 14, transcript variant X9	ENSSSCG00000014394
2vs1	gene7767	72340.1	85065.1	2.02941e-09	-0.233773	CASQ1	XM_021088573	XM_021088573.1	calsequestrin 1, transcript variant X1	ENSSSCG00000006390
2vs1	gene1529	1366.71	1607.16	0.0285383	-0.233802	PPM1A	XM_021062341	XM_021062341.1	protein phosphatase, Mg2+/Mn2+ dependent 1A, transcript variant X7	ENSSSCG00000005084
2vs1	gene2590	4055.15	4770.12	0.0287576	-0.234272	CARNS1	XM_021082758	XM_021082758.1	carnosine synthase 1, transcript variant X2	ENSSSCG00000012911
2vs1	gene24267	1161.04	1365.94	0.0468641	-0.234478	HOXD8	XM_021076351	XM_021076351.1	homeobox D8, transcript variant X3	ENSSSCG00000040349
2vs1	gene7980	969.889	1141.09	0.0407142	-0.234522	DENND4B	XM_013997083	XM_013997083.2	DENN domain containing 4B, transcript variant X3	ENSSSCG00000006568
2vs1	gene23036	4969.56	5851.01	0.0285435	-0.235566	SYNPO2L	XM_001928583	XM_001928583.6	synaptopodin 2 like, transcript variant X1	ENSSSCG00000010303
2vs1	gene10651	1195.81	1408.5	0.0211183	-0.236165	CAPNS1	NM_214318	NM_214318.2	calpain small subunit 1	ENSSSCG00000030149
2vs1	gene19222	2765.35	3258.64	0.0120016	-0.236807	RPL27	NM_001097479	NM_001097479.1	ribosomal protein L27	ENSSSCG00000025507
2vs1	gene2135	1065.38	1255.95	0.0331758	-0.23741	NDUFA8	NM_001190197	NM_001190197.1	NADH:ubiquinone oxidoreductase subunit A8	ENSSSCG00000005528
2vs1	gene6342	673.564	794.267	0.0439924	-0.237809	TEX261	XM_003125039	XM_003125039.6	testis expressed 261	ENSSSCG00000008317
2vs1	gene1127	1859.34	2193.12	0.018049	-0.23819	LRRC28	XM_001925096	XM_001925096.7	leucine rich repeat containing 28, transcript variant X1	ENSSSCG00000004814
2vs1	gene19940	933.486	1101.07	0.0436521	-0.238209	PFN1	NM_001244416	NM_001244416.1	profilin 1
2vs1	gene19401	1143.46	1348.78	0.0313331	-0.238241	NPEPPS	XM_003131527	XM_003131527.5	aminopeptidase puromycin sensitive	ENSSSCG00000017513
2vs1	gene9280	977.228	1153.09	0.0446909	-0.23874	MDM2	XM_013997706	XM_013997706.2	MDM2 proto-oncogene, transcript variant X1
2vs1	gene7018	669.598	790.249	0.0497276	-0.239012	PTK2	XM_021088851	XM_021088851.1	protein tyrosine kinase 2, transcript variant X32	ENSSSCG00000038397
2vs1	gene20502	8283.05	9777.72	0.0149285	-0.239336	MAP4	XM_021070579	XM_021070579.1	microtubule associated protein 4, transcript variant X16	ENSSSCG00000029251
2vs1	gene25836	1426.19	1684.19	0.0192477	-0.239892	TRPC4AP	XM_003359957	XM_003359957.4	transient receptor potential cation channel subfamily C member 4 associated protein, transcript variant X2	ENSSSCG00000007289
2vs1	gene24583	1637.31	1933.76	0.0147153	-0.240085	ATG9A	NM_001190275	NM_001190275.1	autophagy related 9A	ENSSSCG00000016211
2vs1	gene8689	1488.93	1758.8	0.0213679	-0.240314	SNU13	NM_001190226	NM_001190226.1	small nuclear ribonucleoprotein 13, transcript variant 1	ENSSSCG00000000058
2vs1	gene2317	671.407	793.129	0.0460678	-0.240369	PTPA	XM_001926077	XM_001926077.6	protein phosphatase 2 phosphatase activator, transcript variant X1	ENSSSCG00000005671;ENSSSCG00000005672
2vs1	gene19062	2112.79	2496.21	0.0267185	-0.240589	CACNG1	XM_021066261	XM_021066261.1	calcium voltage-gated channel auxiliary subunit gamma 1, transcript variant X1	ENSSSCG00000017271
2vs1	gene27239	1629.81	1925.66	0.0189139	-0.240649	UBA1	XM_021080354	XM_021080354.1	ubiquitin like modifier activating enzyme 1, transcript variant X2	ENSSSCG00000012270
2vs1	gene19276	14074.8	16629.8	1.08642e-08	-0.240655	EIF1	XM_003482982	XM_003482982.4	eukaryotic translation initiation factor 1	ENSSSCG00000017430
2vs1	gene2599	636.491	752.268	0.0461638	-0.241107	GRK2	XM_021078555	XM_021078555.1	G protein-coupled receptor kinase 2, transcript variant X3	ENSSSCG00000012918
2vs1	gene18729	1645.39	1944.88	0.0274792	-0.241246	CUL4A	XM_003131101	XM_003131101.4	cullin 4A	ENSSSCG00000009556
2vs1	gene2489	996.262	1177.94	0.0455284	-0.241665	CTSD	NM_001037721	NM_001037721.1	cathepsin D	ENSSSCG00000040793
2vs1	gene1849	1025.18	1212.5	0.032276	-0.242119	TESK1	XM_003121984	XM_003121984.4	testis-specific kinase 1, transcript variant X1	ENSSSCG00000005310
2vs1	gene11743	3443.29	4072.93	0.0259299	-0.242283	PINK1	XM_021095478	XM_021095478.1	PTEN induced putative kinase 1	ENSSSCG00000003506
2vs1	gene9594	820.045	970.009	0.0458026	-0.242294	USP5	XM_001925784	XM_001925784.6	ubiquitin specific peptidase 5, transcript variant X5	ENSSSCG00000000684
2vs1	gene2040	4937.2	5840.95	0.014464	-0.24251	KIAA0368	XM_021067464	XM_021067464.1	KIAA0368 ortholog, transcript variant X3	ENSSSCG00000005459
2vs1	gene2711	1120.88	1326.57	0.021687	-0.243061	EHD1	XM_021082871	XM_021082871.1	EH domain containing 1	ENSSSCG00000013017
2vs1	gene22390	2852.46	3377.22	0.00586862	-0.243633	MLXIP	XM_021073760	XM_021073760.1	MLX interacting protein, transcript variant X1	ENSSSCG00000009794
2vs1	gene20186	1900.86	2250.82	0.0120281	-0.243798	FLII	XM_021067982	XM_021067982.1	FLII, actin remodeling protein, transcript variant X1	ENSSSCG00000039324
2vs1	gene19740	878.015	1039.89	0.0436375	-0.244118	KIAA0100	XM_003131765	XM_003131765.5	KIAA0100 ortholog, transcript variant X1	ENSSSCG00000017764
2vs1	gene19937	820.3	971.556	0.043814	-0.244145	CAMTA2	XM_021067750	XM_021067750.1	calmodulin binding transcription activator 2, transcript variant X7	ENSSSCG00000017902
2vs1	gene8644	674.354	799.004	0.0446066	-0.244697	SAMM50	XM_021091403	XM_021091403.1	SAMM50 sorting and assembly machinery component, transcript variant X1	ENSSSCG00000028346
2vs1	gene19372	3367.85	3990.53	0.0149833	-0.244751	CACNB1	XM_013979885	XM_013979885.2	calcium voltage-gated channel auxiliary subunit beta 1, transcript variant X4	ENSSSCG00000017510
2vs1	gene26145	894.793	1060.53	0.044873	-0.245154	STX16	XM_005673055	XM_005673055.3	syntaxin 16, transcript variant X4	ENSSSCG00000007516
2vs1	gene13232	926.596	1098.39	0.0458525	-0.245375	ABCF1	XM_005653453	XM_005653453.3	ATP binding cassette subfamily F member 1, transcript variant X1	ENSSSCG00000001346
2vs1	gene5208	1870.32	2217.21	0.014615	-0.245464	RAC1	XM_021085753	XM_021085753.1	ras-related C3 botulinum toxin substrate 1 (rho family, small GTP binding protein Rac1), transcript variant X1	ENSSSCG00000035090
2vs1	gene6412	1494.61	1771.95	0.0466019	-0.245574	UGP2	XM_021085835	XM_021085835.1	UDP-glucose pyrophosphorylase 2, transcript variant X1	ENSSSCG00000008368
2vs1	gene18730	655.767	777.552	0.0435685	-0.245756	LAMP1	NM_001011507	NM_001011507.1	lysosomal associated membrane protein 1	ENSSSCG00000009555
2vs1	gene5793	988.96	1172.85	0.0224811	-0.246032	CDIP1	XM_005662155	XM_005662155.3	cell death inducing p53 target 1, transcript variant X1	ENSSSCG00000007941
2vs1	gene27353	1264	1499.1	0.0346803	-0.246095	PFKFB1	XM_021079420	XM_021079420.1	6-phosphofructo-2-kinase/fructose-2,6-biphosphatase 1, transcript variant X7	ENSSSCG00000024814
2vs1	gene17872	1291.45	1532.14	0.0445499	-0.246557	UBAP2	XM_021064693	XM_021064693.1	ubiquitin associated protein 2, transcript variant X4	ENSSSCG00000010987
2vs1	gene9176	1102.33	1308.44	0.0435962	-0.247294	R3HDM2	XM_021091855	XM_021091855.1	R3H domain containing 2, transcript variant X22	ENSSSCG00000026498
2vs1	gene3653	798.617	948.595	0.0334587	-0.248288	BABAM1	XM_021083571	XM_021083571.1	BRISC and BRCA1 A complex member 1, transcript variant X1	ENSSSCG00000031073
2vs1	gene7892	1884.85	2238.9	0.0326939	-0.248341	SMG5	XM_021089680	XM_021089680.1	SMG5, nonsense mediated mRNA decay factor, transcript variant X1	ENSSSCG00000006490
2vs1	gene9617	482549	573813	0.00474616	-0.249904	GAPDH	XM_021091114	XM_021091114.1	glyceraldehyde-3-phosphate dehydrogenase, transcript variant X2	ENSSSCG00000000694
2vs1	gene26252	1348.87	1605.1	0.0119747	-0.250919	DNAJB6	XM_021079274	XM_021079274.1	DnaJ heat shock protein family (Hsp40) member B6, transcript variant X7	ENSSSCG00000033272
2vs1	gene3995	1199.27	1427.48	0.0200266	-0.251312	CDC37	XM_021076770	XM_021076770.1	cell division cycle 37, transcript variant X1
2vs1	gene12106	10047.2	11962.4	2.10466e-07	-0.251703	VAPA	XM_021096053	XM_021096053.1	VAMP associated protein A, transcript variant X1	ENSSSCG00000038465
2vs1	gene19723	1820.78	2167.91	0.00291675	-0.251743	POLDIP2	XM_003358174	XM_003358174.5	DNA polymerase delta interacting protein 2	ENSSSCG00000028920
2vs1	gene5553	2094.05	2493.86	0.0267736	-0.252084	MAZ	XM_003354553	XM_003354553.4	MYC associated zinc finger protein	ENSSSCG00000025321
2vs1	gene8168	21456.8	25555	0.0158397	-0.252174	LOC100624559	XM_021090661	XM_021090661.1	myomegalin, transcript variant X20	ENSSSCG00000024481
2vs1	gene5537	728.411	867.725	0.0432182	-0.252485	ZNF768	XM_005653012	XM_005653012.3	zinc finger protein 768
2vs1	gene9605	725.616	864.505	0.0372492	-0.252669	COPS7A	XM_003126528	XM_003126528.5	COP9 signalosome subunit 7A, transcript variant X4	ENSSSCG00000035504
2vs1	gene26177	1226.88	1461.95	0.0269537	-0.252906	PSMA7	NM_001243652	NM_001243652.1	proteasome subunit alpha 7	ENSSSCG00000033332
2vs1	gene6730	1134.13	1351.44	0.042932	-0.252915	MAPRE3	XM_021087724	XM_021087724.1	microtubule associated protein RP/EB family member 3, transcript variant X3	ENSSSCG00000029185
2vs1	gene28865	7233.08	8619.14	0.00458304	-0.252933	ADSSL1	NM_001097509	NM_001097509.1	adenylosuccinate synthase like 1
2vs1	gene22309	1471.47	1754.72	0.0460915	-0.253976	ULK1	XM_021072523	XM_021072523.1	unc-51 like autophagy activating kinase 1, transcript variant X5	ENSSSCG00000009742
2vs1	gene17753	711.773	848.971	0.0295528	-0.254298	IPO9	XM_021064520	XM_021064520.1	importin 9, transcript variant X3	ENSSSCG00000039843
2vs1	gene4839	700.394	835.463	0.0432274	-0.25441	TXNDC15	NM_001243618	NM_001243618.1	thioredoxin domain containing 15	ENSSSCG00000026106
2vs1	gene19682	2989.62	3567.41	0.0151464	-0.254914	PSMD11	XM_021067450	XM_021067450.1	proteasome 26S subunit, non-ATPase 11	ENSSSCG00000017731
2vs1	gene13939	115429	137747	0.00206755	-0.255017	PKM	XM_021099115	XM_021099115.1	pyruvate kinase, muscle, transcript variant X9	ENSSSCG00000001930
2vs1	gene10705	61457	73391.4	0.00492234	-0.256032	RYR1	NM_001001534	NM_001001534.1	ryanodine receptor 1
2vs1	gene4215	1224.81	1462.86	0.0207064	-0.25623	NFIC	XM_021084129	XM_021084129.1	nuclear factor I C, transcript variant X5	ENSSSCG00000036537
2vs1	gene5096	8864.64	10589	1.38801e-06	-0.256425	MYOZ3	XM_021082327	XM_021082327.1	myozenin 3, transcript variant X4	ENSSSCG00000035729
2vs1	gene24554	611.934	731.229	0.0459447	-0.256947	CTDSP1	XM_021076473	XM_021076473.1	CTD small phosphatase 1, transcript variant X3	ENSSSCG00000036938
2vs1	gene11998	945.186	1129.47	0.0455499	-0.256977	AGO4	XM_021093286	XM_021093286.1	argonaute 4, RISC catalytic component, transcript variant X2
2vs1	gene19942	1449.3	1732.34	0.0267923	-0.257368	SLC25A11	XM_021067766	XM_021067766.1	solute carrier family 25 member 11, transcript variant X1	ENSSSCG00000032472
2vs1	gene5587	1421.43	1699.27	0.020895	-0.257575	LOC110260088	XM_021088039	XM_021088039.1	eukaryotic translation initiation factor 3 subunit C, transcript variant X1	ENSSSCG00000034927
2vs1	gene18233	713.32	854.034	0.0487518	-0.259745	SACS	XM_021065465	XM_021065465.1	sacsin molecular chaperone, transcript variant X4	ENSSSCG00000035493
2vs1	gene6702	1084.03	1298.09	0.023105	-0.259996	NRBP1	XM_021085722	XM_021085722.1	nuclear receptor binding protein 1, transcript variant X1	ENSSSCG00000022454
2vs1	gene26047	834.706	1000.43	0.0319148	-0.261278	STAU1	XM_021077495	XM_021077495.1	staufen double-stranded RNA binding protein 1, transcript variant X10	ENSSSCG00000027444
2vs1	gene5989	538.578	645.527	0.0445538	-0.261321	MRPL28	XM_005655127	XM_005655127.3	mitochondrial ribosomal protein L28, transcript variant X1
2vs1	gene19205	3292.74	3949.06	0.0194418	-0.262223	DUSP3	XM_003131360	XM_003131360.6	dual specificity phosphatase 3	ENSSSCG00000020744
2vs1	gene8734	31219.3	37456.3	0.00477395	-0.262771	ATF4	XM_021090887	XM_021090887.1	activating transcription factor 4, transcript variant X1
2vs1	gene25823	761.502	914.114	0.0313302	-0.263527	DYNLRB1	XM_013985284	XM_013985284.2	dynein light chain roadblock-type 1, transcript variant X2	ENSSSCG00000037510
2vs1	gene28397	524.112	629.452	0.0432465	-0.26422	RABL6	XM_021081223	XM_021081223.1	RAB, member RAS oncogene family like 6
2vs1	gene18822	998.976	1199.9	0.0266939	-0.264397	NPLOC4	XM_021066476	XM_021066476.1	NPL4 homolog, ubiquitin recognition factor	ENSSSCG00000024235
2vs1	gene19453	981.455	1179.04	0.0244196	-0.264613	PHB	XM_003131560	XM_003131560.6	prohibitin, transcript variant X1	ENSSSCG00000017549
2vs1	gene17280	17586.7	21135.2	0.0423157	-0.26516	MYBPH	XM_005653726	XM_005653726.3	myosin binding protein H, transcript variant X2	ENSSSCG00000030681
2vs1	gene25373	1927.38	2316.33	0.0229074	-0.265199	ADCY2	XM_021077007	XM_021077007.1	adenylate cyclase 2	ENSSSCG00000017101
2vs1	gene13282	907.96	1091.28	0.0267859	-0.265319	CSNK2B	NM_001145377	NM_001145377.2	casein kinase 2 beta	ENSSSCG00000001414
2vs1	gene10755	799.629	961.209	0.0306292	-0.26552	PSMC4	XM_021094383	XM_021094383.1	proteasome 26S subunit, ATPase 4	ENSSSCG00000039235
2vs1	gene19939	205552	247239	0.00177588	-0.266404	ENO3	NM_001044527	NM_001044527.1	enolase 3
2vs1	gene14514	1399.94	1683.9	0.0289798	-0.266443	NEK9	XM_003356752	XM_003356752.4	NIMA related kinase 9	ENSSSCG00000002381
2vs1	gene11091	83296.7	100252	0.00251221	-0.2673	MYBPC2	XM_003127371	XM_003127371.5	myosin binding protein C, fast type	ENSSSCG00000003218
2vs1	gene10209	1035.75	1246.79	0.0235767	-0.267549	AARS	XM_021093791	XM_021093791.1	alanyl-tRNA synthetase	ENSSSCG00000002723
2vs1	gene9584	813.708	979.727	0.0250916	-0.26787	PHB2	NM_001243556	NM_001243556.1	prohibitin 2	ENSSSCG00000024655
2vs1	gene18882	1397.07	1684.39	0.0290511	-0.269824	SYNGR2	XM_021066554	XM_021066554.1	synaptogyrin 2	ENSSSCG00000031600
2vs1	gene191	637.835	769.078	0.0433226	-0.269947	EPM2A	XM_021072181	XM_021072181.1	EPM2A, laforin glucan phosphatase, transcript variant X2
2vs1	gene6962	4808.97	5800.39	0.0180293	-0.270423	PLEC	XM_021090372	XM_021090372.1	plectin, transcript variant X9	ENSSSCG00000039094
2vs1	gene3250	103620	124984	0.00551854	-0.270446	LDHA	XM_013994501	XM_013994501.2	lactate dehydrogenase A, transcript variant X1	ENSSSCG00000013366
2vs1	gene5098	927.518	1119.05	0.02066	-0.270827	DCTN4	XM_021079895	XM_021079895.1	dynactin subunit 4, transcript variant X1	ENSSSCG00000021427
2vs1	gene13278	1149.57	1387.29	0.0270068	-0.271164	BAG6	NM_001145382	NM_001145382.1	BCL2 associated athanogene 6	ENSSSCG00000001410
2vs1	gene28882	1244.66	1502.29	0.0272942	-0.271408	PACS2	XM_021081612	XM_021081612.1	phosphofurin acidic cluster sorting protein 2, transcript variant X6
2vs1	gene12481	2559.18	3090.85	0.0204368	-0.272325	USP24	XM_021097812	XM_021097812.1	ubiquitin specific peptidase 24, transcript variant X1	ENSSSCG00000029633
2vs1	gene19346	1191.31	1438.88	0.0127871	-0.272397	THRA	XM_021066243	XM_021066243.1	thyroid hormone receptor, alpha, transcript variant X1	ENSSSCG00000035969
2vs1	gene10604	1149.21	1388.42	0.0155616	-0.272803	USF2	XM_003127041	XM_003127041.5	upstream transcription factor 2, c-fos interacting, transcript variant X4	ENSSSCG00000002885
2vs1	gene19753	727.206	878.782	0.0235698	-0.273142	FLOT2	XM_021067496	XM_021067496.1	flotillin 2, transcript variant X1	ENSSSCG00000017777
2vs1	gene22515	2900.6	3506.46	0.0030173	-0.273663	RNF10	XM_013982944	XM_013982944.2	ring finger protein 10, transcript variant X1	ENSSSCG00000009910
2vs1	gene20256	1111.11	1343.5	0.0223374	-0.273993	PLCL2	XM_021069677	XM_021069677.1	phospholipase C like 2, transcript variant X1	ENSSSCG00000029811
2vs1	gene1471	969.882	1173.94	0.0457021	-0.275483	SAMD4A	XM_021102232	XM_021102232.1	sterile alpha motif domain containing 4A, transcript variant X1	ENSSSCG00000023408
2vs1	gene19889	2139.62	2590.11	0.04536	-0.275659	P2RX5	XM_021067677	XM_021067677.1	purinergic receptor P2X 5, transcript variant X6	ENSSSCG00000017868
2vs1	gene9612	738.689	895.062	0.0396297	-0.277022	CHD4	XM_021092425	XM_021092425.1	chromodomain helicase DNA binding protein 4, transcript variant X1	ENSSSCG00000000697
2vs1	gene26830	757.653	918.097	0.0275218	-0.277109	NUDCD3	XM_003134880	XM_003134880.6	NudC domain containing 3, transcript variant X2	ENSSSCG00000016747
2vs1	gene18787	477.651	578.937	0.0432433	-0.277448	GPS1	XM_021066384	XM_021066384.1	G protein pathway suppressor 1, transcript variant X4	ENSSSCG00000033689
2vs1	gene25719	597.361	724.071	0.0444342	-0.277528	NSFL1C	XM_005672807	XM_005672807.3	NSFL1 cofactor, transcript variant X1	ENSSSCG00000007187
2vs1	gene10594	1662.77	2016.03	0.00646888	-0.277923	SCN1B	XM_021097212	XM_021097212.1	sodium voltage-gated channel beta subunit 1, transcript variant X2	ENSSSCG00000023267
2vs1	gene5971	928.154	1125.71	0.0175762	-0.278404	STUB1	XM_003124708	XM_003124708.5	STIP1 homology and U-box containing protein 1	ENSSSCG00000007988;ENSSSCG00000008008
2vs1	gene4423	1216.07	1475.23	0.0136333	-0.278713	CLTB	XM_005661470	XM_005661470.3	clathrin light chain B, transcript variant X1	ENSSSCG00000014058
2vs1	gene11073	729.821	885.403	0.020306	-0.278793	AKT1S1	XM_005664751	XM_005664751.3	AKT1 substrate 1, transcript variant X5	ENSSSCG00000003194
2vs1	gene14840	783.673	951.072	0.0324232	-0.279303	WDR1	XM_021101012	XM_021101012.1	WD repeat domain 1	ENSSSCG00000036501
2vs1	gene10516	8367.14	10160.7	0.00611566	-0.280193	PHKB	XM_021094236	XM_021094236.1	phosphorylase kinase regulatory subunit beta, transcript variant X4	ENSSSCG00000002844
2vs1	gene24823	593.04	721.526	0.0432935	-0.282921	STK25	XM_021076025	XM_021076025.1	serine/threonine kinase 25, transcript variant X4	ENSSSCG00000016372
2vs1	gene23636	603.954	734.957	0.0431367	-0.283221	ZRANB1	XM_013983854	XM_013983854.2	zinc finger RANBP2-type containing 1, transcript variant X3	ENSSSCG00000010738
2vs1	gene22079	1622.72	1974.97	0.0202474	-0.28342	SEMA4D	XM_021073817	XM_021073817.1	semaphorin 4D, transcript variant X10	ENSSSCG00000009584
2vs1	gene23035	50849	61889.1	8.36567e-06	-0.283465	MYOZ1	XM_021072180	XM_021072180.1	myozenin 1, transcript variant X2	ENSSSCG00000010304
2vs1	gene9509	34043.8	41440.3	1.76674e-09	-0.283642	YBX3	XM_003126475	XM_003126475.3	Y-box binding protein 3, transcript variant X1	ENSSSCG00000000633
2vs1	gene12544	1412.2	1719.02	0.0257044	-0.283647	NRDC	XM_003127978	XM_003127978.6	nardilysin convertase, transcript variant X1	ENSSSCG00000003870
2vs1	gene18771	480.265	584.949	0.0432852	-0.284479	FOXK2	XM_013989821	XM_013989821.2	forkhead box K2, transcript variant X3	ENSSSCG00000017125
2vs1	gene11940	1049.67	1278.92	0.0204512	-0.284991	EIF3I	NM_001244624	NM_001244624.1	eukaryotic translation initiation factor 3 subunit I	ENSSSCG00000003612
2vs1	gene26705	620.402	756.012	0.04337	-0.285208	GARS	XM_003134806	XM_003134806.6	glycyl-tRNA synthetase	ENSSSCG00000016677
2vs1	gene4910	985.819	1201.91	0.0309621	-0.285937	PROB1	XM_021084868	XM_021084868.1	proline rich basic protein 1
2vs1	gene19742	785.392	957.589	0.0283901	-0.285994	SUPT6H	XM_021067480	XM_021067480.1	SPT6 homolog, histone chaperone	ENSSSCG00000017773
2vs1	gene5152	1103.67	1345.99	0.0277864	-0.286359	EIF3B	XR_002342196	XR_002342196.1	eukaryotic translation initiation factor 3 subunit B	ENSSSCG00000039390
2vs1	gene3796	3825.2	4665.9	1.01497e-12	-0.286622	TECR	XM_021083691	XM_021083691.1	trans-2,3-enoyl-CoA reductase, transcript variant X2	ENSSSCG00000031299
2vs1	gene18970	660.922	806.245	0.0427817	-0.286739	KCTD2	XM_021066666	XM_021066666.1	potassium channel tetramerization domain containing 2	ENSSSCG00000031958
2vs1	gene4328	9252.56	11287.5	0.00527799	-0.2868	CDC34	XM_021084306	XM_021084306.1	cell division cycle 34	ENSSSCG00000039640
2vs1	gene7733	637.537	777.913	0.0282352	-0.2871	DEDD	XM_003355092	XM_003355092.4	death effector domain containing, transcript variant X1	ENSSSCG00000006365
2vs1	gene5093	698.995	853.756	0.0292193	-0.288541	NDST1	XM_021085025	XM_021085025.1	N-deacetylase and N-sulfotransferase 1, transcript variant X3	ENSSSCG00000032731
2vs1	gene13702	1809.78	2210.69	0.016867	-0.288681	IDH3A	XM_001927338	XM_001927338.5	isocitrate dehydrogenase 3 (NAD(+)) alpha	ENSSSCG00000032498
2vs1	gene13526	4304.19	5257.97	0.0146477	-0.288765	APOBEC2	XM_001928899	XM_001928899.6	apolipoprotein B mRNA editing enzyme catalytic subunit 2	ENSSSCG00000036018
2vs1	gene10888	551.066	673.548	0.0327889	-0.289556	CLPTM1	XM_003127223	XM_003127223.6	CLPTM1, transmembrane protein	ENSSSCG00000003085
2vs1	gene823	1525.09	1865.22	0.0125388	-0.290448	TLN2	XM_021094283	XM_021094283.1	talin 2, transcript variant X5	ENSSSCG00000024088
2vs1	gene3590	694.092	848.927	0.0267794	-0.290513	COPE	XM_003123536	XM_003123536.4	coatomer protein complex subunit epsilon	ENSSSCG00000027840
2vs1	gene14663	736.032	901.064	0.0423061	-0.291862	DICER1	XM_021098178	XM_021098178.1	dicer 1, ribonuclease III, transcript variant X12	ENSSSCG00000028225
2vs1	gene2304	479.51	587.034	0.0460217	-0.291882	ZER1	XM_005660496	XM_005660496.2	zyg-11 related cell cycle regulator, transcript variant X3	ENSSSCG00000005659
2vs1	gene2366	1776.33	2174.83	0.016948	-0.292004	RAPGEF1	XM_005654593	XM_005654593.3	Rap guanine nucleotide exchange factor 1	ENSSSCG00000005719
2vs1	gene11614	548.991	672.382	0.0433924	-0.292498	MTOR	XM_003127584	XM_003127584.6	mechanistic target of rapamycin	ENSSSCG00000003413
2vs1	gene12656	2148.61	2632.7	0.0155152	-0.29314	IPO13	XM_003356487	XM_003356487.4	importin 13, transcript variant X1	ENSSSCG00000029430
2vs1	gene19386	1857.76	2276.77	0.0111638	-0.293424	PIP4K2B	XM_021067062	XM_021067062.1	phosphatidylinositol-5-phosphate 4-kinase type 2 beta	ENSSSCG00000033291
2vs1	gene22707	1443.16	1769.65	0.0140907	-0.294225	CHCHD10	XM_001929468	XM_001929468.4	coiled-coil-helix-coiled-coil-helix domain containing 10	ENSSSCG00000010073
2vs1	gene4301	686.342	841.662	0.0216842	-0.294314	TMEM259	XM_003353958	XM_003353958.4	transmembrane protein 259, transcript variant X6	ENSSSCG00000027779
2vs1	gene11597	6422.15	7882.63	0.0048477	-0.295621	KIF1B	XM_021095325	XM_021095325.1	kinesin family member 1B, transcript variant X13	ENSSSCG00000003401
2vs1	gene15842	853.017	1047.16	0.022335	-0.295841	EIF3F	XM_021062272	XM_021062272.1	eukaryotic translation initiation factor 3 subunit F	ENSSSCG00000039647
2vs1	gene17740	7447.93	9150.09	0.0149747	-0.296947	CACNA1S	XM_021064504	XM_021064504.1	calcium voltage-gated channel subunit alpha1 S	ENSSSCG00000024784
2vs1	gene6951	1194.59	1468.23	0.00473755	-0.297555	MAF1	XM_003125444	XM_003125444.4	MAF1 homolog, negative regulator of RNA polymerase III	ENSSSCG00000005915
2vs1	gene4187	2288.8	2813.8	9.51586e-05	-0.297927	MAP2K2	NM_001244550	NM_001244550.1	mitogen-activated protein kinase kinase 2	ENSSSCG00000027127
2vs1	gene10274	1192.16	1466.08	0.0159838	-0.298388	VPS4A	XM_005655767	XM_005655767.3	vacuolar protein sorting 4 homolog A, transcript variant X2	ENSSSCG00000025151
2vs1	gene7012	2532.2	3114.25	0.0325538	-0.29849	PTP4A3	XM_021088815	XM_021088815.1	protein tyrosine phosphatase type IVA, member 3, transcript variant X4	ENSSSCG00000036569
2vs1	gene20639	636.744	783.3	0.0291121	-0.29885	BAP1	XM_005669632	XM_005669632.3	BRCA1 associated protein 1, transcript variant X2	ENSSSCG00000011438
2vs1	gene22538	748.824	921.184	0.028455	-0.298863	UBE3B	XM_005670735	XM_005670735.3	ubiquitin protein ligase E3B, transcript variant X10	ENSSSCG00000009933
2vs1	gene18967	745.945	917.823	0.0463758	-0.299148	SLC16A5	XM_005668613	XM_005668613.3	solute carrier family 16 member 5, transcript variant X5	ENSSSCG00000017215
2vs1	gene21308	981.046	1207.46	0.0213237	-0.299587	AP2M1	NM_001243644	NM_001243644.1	adaptor related protein complex 2 mu 1 subunit	ENSSSCG00000024437
2vs1	gene5508	1152.28	1418.68	0.00550205	-0.300059	BCKDK	XM_003124471	XM_003124471.6	branched chain ketoacid dehydrogenase kinase	ENSSSCG00000007763
2vs1	gene22866	626615	771888	2.68065e-08	-0.300812	ACTA1	XM_005670976	XM_005670976.2	actin, alpha 1, skeletal muscle, transcript variant X3
2vs1	gene13414	1460.62	1799.44	0.0159911	-0.300971	C7H6orf125	NM_001243451	NM_001243451.1	uncharacterized protein C6orf125 homolog	ENSSSCG00000030668
2vs1	gene1073	967.853	1192.96	0.0272719	-0.30169	C1H15orf52	XM_003353393	XM_003353393.4	chromosome 1 C15orf52 homolog	ENSSSCG00000023975
2vs1	gene28024	410.847	506.533	0.0443869	-0.302056	NAA10	XM_013986517	XM_013986517.2	N(alpha)-acetyltransferase 10, NatA catalytic subunit, transcript variant X2	ENSSSCG00000012791
2vs1	gene18082	785.609	968.99	0.0318073	-0.302669	PARD3	XM_021064231	XM_021064231.1	par-3 family cell polarity regulator
2vs1	gene11673	3051.97	3765.65	0.0106707	-0.30316	PLEKHM2	XM_021095385	XM_021095385.1	pleckstrin homology and RUN domain containing M2, transcript variant X1	ENSSSCG00000003468
2vs1	gene6252	744.921	919.315	0.0312166	-0.303472	ELMOD3	XM_005655213	XM_005655213.2	ELMO domain containing 3, transcript variant X4	ENSSSCG00000008238
2vs1	gene17700	1381.41	1705	0.0363353	-0.303632	CAPN2	NM_001100188	NM_001100188.1	calpain 2	ENSSSCG00000029411
2vs1	gene19812	1201.29	1482.69	0.0460419	-0.303639	SLC43A2	XM_013990000	XM_013990000.2	solute carrier family 43 member 2, transcript variant X5	ENSSSCG00000024108
2vs1	gene21152	878.936	1084.9	0.037338	-0.303726	MLF1	XM_003358641	XM_003358641.5	myeloid leukemia factor 1
2vs1	gene5802	562.521	694.716	0.0431878	-0.304516	ADCY9	XM_021086710	XM_021086710.1	adenylate cyclase 9, transcript variant X2	ENSSSCG00000007950
2vs1	gene12418	71849.5	88824.1	0.00395946	-0.305974	PGM1	XM_021093573	XM_021093573.1	phosphoglucomutase 1, transcript variant X3	ENSSSCG00000003812
2vs1	gene24596	51515.6	63687	0.0139491	-0.305989	DES	XM_021074667	XM_021074667.1	desmin, transcript variant X1
2vs1	gene3853	1002.13	1238.91	0.0252067	-0.306009	ASNA1	XM_003123324	XM_003123324.4	arsA arsenite transporter, ATP-binding, homolog 1 (bacterial)	ENSSSCG00000038776
2vs1	gene9705	1327.05	1641.6	0.00124504	-0.306888	BCL2L13	XM_003126595	XM_003126595.6	BCL2 like 13, transcript variant X1	ENSSSCG00000040373
2vs1	gene22135	1382.67	1710.84	0.046104	-0.307253	PEBP4	XM_021072045	XM_021072045.1	phosphatidylethanolamine binding protein 4, transcript variant X3	ENSSSCG00000009631;ENSSSCG00000034561
2vs1	gene2484	398.703	493.602	0.044723	-0.308034	MOB2	XM_021082597	XM_021082597.1	MOB kinase activator 2, transcript variant X2	ENSSSCG00000037847
2vs1	gene17755	2403.69	2977.78	0.0210009	-0.308986	SHISA4	XM_021064525	XM_021064525.1	shisa family member 4	ENSSSCG00000031981
2vs1	gene26210	2528.92	3133.52	0.0330153	-0.309264	PPDPF	XM_021077704	XM_021077704.1	pancreatic progenitor cell differentiation and proliferation factor
2vs1	gene4173	444.405	551.188	0.046099	-0.310669	UBXN6	XM_003123069	XM_003123069.4	UBX domain protein 6, transcript variant X2
2vs1	gene19935	4049.62	5032.89	0.00468784	-0.313599	KIF1C	XM_021067761	XM_021067761.1	kinesin family member 1C	ENSSSCG00000017900
2vs1	gene25348	2072.26	2575.46	0.00640016	-0.313625	ANXA6	XM_005672613	XM_005672613.3	annexin A6	ENSSSCG00000017089
2vs1	gene2618	86402.3	107386	1.4988e-14	-0.313669	ACTN3	XM_003122492	XM_003122492.4	actinin alpha 3, transcript variant X2	ENSSSCG00000038323
2vs1	gene24478	1503	1869.4	0.0217159	-0.314728	CCNYL1	XM_005672131	XM_005672131.3	cyclin Y like 1, transcript variant X2	ENSSSCG00000024696
2vs1	gene20530	739.308	919.771	0.0340725	-0.3151	PRKAR2A	NM_214258	NM_214258.2	protein kinase cAMP-dependent type II regulatory subunit alpha	ENSSSCG00000011363
2vs1	gene10950	1869.49	2327.97	0.0178277	-0.316428	STRN4	XM_021094615	XM_021094615.1	striatin 4, transcript variant X1	ENSSSCG00000003104
2vs1	gene4061	608.526	757.832	0.0205739	-0.31656	RAB11B	NM_001244875	NM_001244875.1	RAB11B, member RAS oncogene family	ENSSSCG00000013600
2vs1	gene13840	4300.16	5356.12	0.010763	-0.316798	IDH2	NM_001164007	NM_001164007.1	isocitrate dehydrogenase (NADP(+)) 2, mitochondrial	ENSSSCG00000001852
2vs1	gene16770	428.773	534.086	0.0457035	-0.316856	PKNOX2	XM_021063089	XM_021063089.1	PBX/knotted 1 homeobox 2, transcript variant X2	ENSSSCG00000015211
2vs1	gene6306	1363.18	1698.46	0.0114837	-0.317247	DCTN1	XM_021087352	XM_021087352.1	dynactin subunit 1, transcript variant X4	ENSSSCG00000008274
2vs1	gene898	1014.09	1263.58	0.0281365	-0.317332	MAPK6	XM_001925291	XM_001925291.5	mitogen-activated protein kinase 6, transcript variant X1	ENSSSCG00000004624
2vs1	gene9588	702.847	876.43	0.0215126	-0.318427	ATN1	XM_005652594	XM_005652594.3	atrophin 1, transcript variant X2	ENSSSCG00000025117
2vs1	gene13539	424.384	529.617	0.0435493	-0.319578	TFEB	XM_021098672	XM_021098672.1	transcription factor EB, transcript variant X2	ENSSSCG00000001621
2vs1	gene11704	783.916	978.652	0.0211561	-0.320098	ARHGEF10L	XM_021095432	XM_021095432.1	Rho guanine nucleotide exchange factor 10 like, transcript variant X2	ENSSSCG00000003486
2vs1	gene18161	346.548	432.838	0.0457131	-0.320774	LOC100738684	XM_003482845	XM_003482845.3	malignant T-cell-amplified sequence 1	ENSSSCG00000039612
2vs1	gene25349	645.166	806.264	0.0289872	-0.321582	TNIP1	XM_005672611	XM_005672611.3	TNFAIP3 interacting protein 1, transcript variant X7	ENSSSCG00000017091
2vs1	gene23392	4544.18	5683.24	0	-0.322694	HIF1AN	XM_003125588	XM_003125588.4	hypoxia inducible factor 1 alpha subunit inhibitor	ENSSSCG00000010555
2vs1	gene27668	541.632	677.633	0.0253961	-0.323192	PRPS1	XM_003135301	XM_003135301.4	phosphoribosyl pyrophosphate synthetase 1	ENSSSCG00000012560
2vs1	gene4393	13510.9	16910.5	1.306e-11	-0.323796	PDLIM7	XM_021084376	XM_021084376.1	PDZ and LIM domain 7, transcript variant X1	ENSSSCG00000040507
2vs1	gene3588	622.877	780.213	0.0334531	-0.324921	HOMER3	XM_021083465	XM_021083465.1	homer scaffolding protein 3, transcript variant X1	ENSSSCG00000013919
2vs1	gene8979	3130.89	3924.9	1.96836e-10	-0.326082	PCBP2	XM_021091183	XM_021091183.1	poly(rC) binding protein 2, transcript variant X2	ENSSSCG00000000274
2vs1	gene12499	950.333	1192.62	0.0459355	-0.327625	MRPL37	XM_021096592	XM_021096592.1	mitochondrial ribosomal protein L37	ENSSSCG00000032083
2vs1	gene11859	1503.2	1887.13	0.00121701	-0.328157	WDTC1	XM_005656068	XM_005656068.3	WD and tetratricopeptide repeats 1, transcript variant X3	ENSSSCG00000003570
2vs1	gene12007	1816.78	2281.37	0.00516141	-0.328522	MAP7D1	XM_021095927	XM_021095927.1	MAP7 domain containing 1, transcript variant X7	ENSSSCG00000003637
2vs1	gene4248	650.338	816.957	0.0310097	-0.32907	DOT1L	XM_021084186	XM_021084186.1	DOT1 like histone lysine methyltransferase, transcript variant X2	ENSSSCG00000013457
2vs1	gene8786	383.679	481.982	0.0344541	-0.32908	GGA1	XM_021091505	XM_021091505.1	golgi associated, gamma adaptin ear containing, ARF binding protein 1, transcript variant X1	ENSSSCG00000024895
2vs1	gene26296	1334.62	1677.49	0.00468438	-0.329881	ABCF2	XM_021079257	XM_021079257.1	ATP binding cassette subfamily F member 2, transcript variant X1	ENSSSCG00000016441
2vs1	gene1740	2552.73	3210.42	0.00403813	-0.330724	VLDLR	XM_013993593	XM_013993593.2	very low density lipoprotein receptor, transcript variant X1	ENSSSCG00000005229;ENSSSCG00000040670
2vs1	gene13295	371.332	467.191	0.0433045	-0.331302	VARS	NM_001195378	NM_001195378.1	valyl-tRNA synthetase	ENSSSCG00000038950
2vs1	gene19897	563.837	709.895	0.0454816	-0.332328	ZZEF1	XM_021067699	XM_021067699.1	zinc finger ZZ-type and EF-hand domain containing 1	ENSSSCG00000032049
2vs1	gene22344	893.845	1125.41	0.0271026	-0.332357	NCOR2	NM_001044576	NM_001044576.1	nuclear receptor corepressor 2	ENSSSCG00000009761
2vs1	gene5914	3149.39	3965.62	4.996e-15	-0.332472	RPL3L	XM_021086793	XM_021086793.1	ribosomal protein L3 like, transcript variant X4	ENSSSCG00000032657
2vs1	gene24597	3471.46	4373.43	0.00405235	-0.333224	SPEG	XM_021074879	XM_021074879.1	SPEG complex locus
2vs1	gene4160	8906.75	11230.1	3.79696e-14	-0.334401	FEM1A	XM_021084041	XM_021084041.1	fem-1 homolog A	ENSSSCG00000037153
2vs1	gene13820	736.52	929.112	0.0231159	-0.335129	POLG	XM_001927064	XM_001927064.5	DNA polymerase gamma, catalytic subunit, transcript variant X1	ENSSSCG00000001838
2vs1	gene12606	574.773	725.379	0.0297733	-0.335744	POMGNT1	XM_005665452	XM_005665452.3	protein O-linked mannose N-acetylglucosaminyltransferase 1 (beta 1,2-), transcript variant X3	ENSSSCG00000029145
2vs1	gene19931	718.138	906.322	0.0327145	-0.335764	RABEP1	XM_021067731	XM_021067731.1	rabaptin, RAB GTPase binding effector protein 1, transcript variant X2	ENSSSCG00000017895
2vs1	gene6843	598.267	755.47	0.0343357	-0.336585	E2F6	XM_005655271	XM_005655271.3	E2F transcription factor 6, transcript variant X1	ENSSSCG00000026161
2vs1	gene2565	1058.62	1336.82	0.0126308	-0.336625	NDUFS8	XM_003122434	XM_003122434.3	NADH:ubiquinone oxidoreductase core subunit S8, transcript variant X1
2vs1	gene4271	2839.86	3589.99	0.00189187	-0.33816	MBD3	XM_003122994	XM_003122994.4	methyl-CpG binding domain protein 3, transcript variant X4	ENSSSCG00000013435
2vs1	gene6234	451.62	570.942	0.0457657	-0.338236	POLR1A	XM_005662406	XM_005662406.3	RNA polymerase I subunit A	ENSSSCG00000008226
2vs1	gene23460	3819.03	4835.62	4.996e-15	-0.340496	NEURL1	XM_001926877	XM_001926877.5	neuralized E3 ubiquitin protein ligase 1, transcript variant X5	ENSSSCG00000010603
2vs1	gene3998	1458.16	1849.8	0.00255949	-0.343223	KEAP1	XM_005654811	XM_005654811.3	kelch like ECH associated protein 1, transcript variant X3	ENSSSCG00000023667
2vs1	gene22574	3464.32	4395.88	0.002714	-0.343576	MYO18B	XM_021073682	XM_021073682.1	myosin XVIIIB	ENSSSCG00000009957
2vs1	gene2717	171703	217966	1.07676e-07	-0.344188	PYGM	XM_003122588	XM_003122588.5	glycogen phosphorylase, muscle associated	ENSSSCG00000013022
2vs1	gene10185	925.751	1175.23	0.0221171	-0.344241	CFDP1	XM_021093775	XM_021093775.1	craniofacial development protein 1	ENSSSCG00000033842
2vs1	gene29162	1515.44	1924.09	0.0192072	-0.344444	DUSP26	XM_005671786	XM_005671786.3	dual specificity phosphatase 26, transcript variant X1
2vs1	gene22358	1157.17	1471.54	0.0191383	-0.346729	RILPL1	XM_001925355	XM_001925355.7	Rab interacting lysosomal protein like 1, transcript variant X2	ENSSSCG00000009773
2vs1	gene16588	2132.18	2712.28	0.0433781	-0.347181	SCN4B	XM_013977487	XM_013977487.2	sodium voltage-gated channel beta subunit 4, transcript variant X2	ENSSSCG00000029199
2vs1	gene28429	1596.71	2033	8.60529e-06	-0.348506	UBAC1	XM_021081204	XM_021081204.1	UBA domain containing 1, transcript variant X2
2vs1	gene9663	424.815	540.945	0.0436913	-0.348645	TEAD4	NM_001142666	NM_001142666.1	TEA domain transcription factor 4	ENSSSCG00000000736
2vs1	gene4656	1431	1822.24	0.0283381	-0.34869	REEP5	XM_003480887	XM_003480887.4	receptor accessory protein 5	ENSSSCG00000022048
2vs1	gene22986	1037.92	1322.83	0.012719	-0.349926	LRRC20	XM_001925274	XM_001925274.5	leucine rich repeat containing 20, transcript variant X1	ENSSSCG00000010267
2vs1	gene5592	153404	195567	2.89027e-07	-0.350329	ATP2A1	XM_021085681	XM_021085681.1	ATPase sarcoplasmic/endoplasmic reticulum Ca2+ transporting 1, transcript variant X1	ENSSSCG00000007805
2vs1	gene12012	1891.14	2416.43	6.99441e-15	-0.353618	STK40	XM_021095940	XM_021095940.1	serine/threonine kinase 40, transcript variant X2	ENSSSCG00000036832
2vs1	gene5202	286.179	365.685	0.0469736	-0.35368	C3H7orf26	XM_021086074	XM_021086074.1	chromosome 3 C7orf26 homolog, transcript variant X2	ENSSSCG00000036192
2vs1	gene25820	614.475	786.159	0.0267694	-0.355467	AHCY	NM_001011727	NM_001011727.1	adenosylhomocysteinase	ENSSSCG00000007278
2vs1	gene8349	610.124	780.756	0.0325664	-0.355769	AMIGO1	XM_005663589	XM_005663589.3	adhesion molecule with Ig like domain 1, transcript variant X2	ENSSSCG00000034883
2vs1	gene26479	720.083	921.856	0.023595	-0.356379	AKR1B1	XM_021078497	XM_021078497.1	aldo-keto reductase family 1 member B, transcript variant X1
2vs1	gene3836	4726.06	6059.75	1.68619e-08	-0.358621	NFIX	XM_021083712	XM_021083712.1	nuclear factor I X, transcript variant X8	ENSSSCG00000013742
2vs1	gene23682	1884.57	2419.08	0.0129997	-0.360222	BNIP3	XM_003359404	XM_003359404.4	BCL2 interacting protein 3	ENSSSCG00000024388
2vs1	gene22758	253.313	325.195	0.0460951	-0.360384	LOC100152722	XM_021074293	XM_021074293.1	protein HIRA, transcript variant X4	ENSSSCG00000010118
2vs1	gene11583	730.668	938.082	0.0203758	-0.360498	GPR157	XM_021095284	XM_021095284.1	G protein-coupled receptor 157	ENSSSCG00000033456
2vs1	gene2414	1446.8	1862.65	0.0143436	-0.364492	RXRA	XM_021071603	XM_021071603.1	retinoid X receptor alpha, transcript variant X27	ENSSSCG00000038220
2vs1	gene4504	37343.7	48123.8	0.00388379	-0.365886	CMYA5	XM_021077698	XM_021077698.1	cardiomyopathy associated 5, transcript variant X1	ENSSSCG00000014114;ENSSSCG00000026098
2vs1	gene20412	1168.2	1509.3	0.00578349	-0.369585	ZBTB47	XM_021071707	XM_021071707.1	zinc finger and BTB domain containing 47, transcript variant X1	ENSSSCG00000030065
2vs1	gene25773	9868.79	12752	0.00125894	-0.369782	MYLK2	XM_013985219	XM_013985219.2	myosin light chain kinase 2	ENSSSCG00000007231
2vs1	gene27246	2023.99	2616.02	1.84197e-12	-0.370169	ARAF	NM_214329	NM_214329.1	A-Raf proto-oncogene, serine/threonine kinase	ENSSSCG00000012275
2vs1	gene4081	227.65	294.596	0.0441099	-0.371922	EVI5L	XM_013994704	XM_013994704.2	ecotropic viral integration site 5 like, transcript variant X5	ENSSSCG00000013585
2vs1	gene20174	682.247	883.2	0.0221987	-0.372447	EPN2	XM_021067960	XM_021067960.1	epsin 2, transcript variant X5	ENSSSCG00000040457
2vs1	gene10393	490.616	635.439	0.0336526	-0.373161	LOC100523672	XM_003126939	XM_003126939.5	heat shock factor protein 4, transcript variant X6
2vs1	gene26796	32510.2	42132.9	7.28972e-13	-0.374053	PGAM2	XM_021078443	XM_021078443.1	phosphoglycerate mutase 2, transcript variant X2	ENSSSCG00000016720
2vs1	gene28880	1782.5	2315.93	0.00471452	-0.377691	BTBD6	XM_021081619	XM_021081619.1	BTB domain containing 6
2vs1	gene26209	45812.1	59564.7	0	-0.378728	EEF1A2	XM_021077778	XM_021077778.1	eukaryotic translation elongation factor 1 alpha 2	ENSSSCG00000040401
2vs1	gene25624	375.136	487.805	0.0439776	-0.378892	RALGAPA2	XM_021078026	XM_021078026.1	Ral GTPase activating protein catalytic alpha subunit 2, transcript variant X2	ENSSSCG00000026506
2vs1	gene7285	2059.2	2678.53	0.00685962	-0.379359	PTDSS1	XM_021089073	XM_021089073.1	phosphatidylserine synthase 1, transcript variant X1	ENSSSCG00000006089
2vs1	gene10078	1715.62	2235.21	3.04978e-13	-0.381681	FBXO31	XM_021093684	XM_021093684.1	F-box protein 31, transcript variant X2	ENSSSCG00000002654
2vs1	gene6945	408.245	532.026	0.0218674	-0.382064	HSF1	XM_013987992	XM_013987992.2	heat shock transcription factor 1, transcript variant X3
2vs1	gene4095	1100.69	1435.59	0.00536018	-0.38324	ZNF358	XM_005674492	XM_005674492.3	zinc finger protein 358
2vs1	gene17744	31147.6	40635	0.0318617	-0.383601	IGFN1	XM_021064507	XM_021064507.1	immunoglobulin-like and fibronectin type III domain containing 1, transcript variant X4	ENSSSCG00000036948
2vs1	gene25672	645.874	842.91	0.0117849	-0.384125	CENPB	XM_021077378	XM_021077378.1	centromere protein B	ENSSSCG00000035900
2vs1	gene17748	11180.2	14593.5	0.0333351	-0.384374	TNNI1	XM_021064063	XM_021064063.1	troponin I1, slow skeletal type, transcript variant X1	ENSSSCG00000024061
2vs1	gene9710	2893.53	3778.85	0.0153049	-0.385119	TUBA8	XM_003126597	XM_003126597.6	tubulin alpha 8
2vs1	gene14070	549.978	718.256	0.0199357	-0.385124	FITM1	NM_001128470	NM_001128470.1	fat storage inducing transmembrane protein 1
2vs1	gene23701	587.601	767.666	0.0256604	-0.38564	TUBGCP2	XM_021073927	XM_021073927.1	tubulin gamma complex associated protein 2, transcript variant X1	ENSSSCG00000010773
2vs1	gene20121	346.179	452.379	0.0439488	-0.386016	COX10	NM_001244626	NM_001244626.1	COX10 homolog, cytochrome c oxidase assembly protein, heme A: farnesyltransferase (yeast)	ENSSSCG00000018023
2vs1	gene3267	1833.38	2396.78	0.00415216	-0.386592	KCNJ11	XM_005661104	XM_005661104.3	potassium voltage-gated channel subfamily J member 11
2vs1	gene26131	1120.65	1465.34	0.00530062	-0.386898	RBM38	NM_001105312	NM_001105312.1	RNA binding motif protein 38	ENSSSCG00000007504
2vs1	gene5894	1031.26	1351.25	0.00527137	-0.389889	PGP	XM_003481109	XM_003481109.4	phosphoglycolate phosphatase
2vs1	gene25971	1058.38	1388.02	0.0145194	-0.391165	DBNDD2	NM_001243672	NM_001243672.1	dysbindin domain containing 2	ENSSSCG00000033586
2vs1	gene16918	1651.45	2167.15	0.0059137	-0.392064	MAPKAPK2	XM_003130462	XM_003130462.6	mitogen-activated protein kinase-activated protein kinase 2	ENSSSCG00000015650
2vs1	gene19058	908.225	1192.91	0.0199418	-0.393363	PRKCA	XM_021066740	XM_021066740.1	protein kinase C alpha	ENSSSCG00000017268
2vs1	gene11320	690.972	907.581	0.0175881	-0.393399	EPN1	XM_021095052	XM_021095052.1	epsin 1, transcript variant X2	ENSSSCG00000039670
2vs1	gene17523	926.339	1219.02	0.0267633	-0.396107	GRB10	XM_021101958	XM_021101958.1	growth factor receptor bound protein 10, transcript variant X4	ENSSSCG00000015631
2vs1	gene11633	371.628	489.796	0.0221722	-0.398323	KIAA2013	XM_003127576	XM_003127576.4	KIAA2013 ortholog, transcript variant X3	ENSSSCG00000003432
2vs1	gene3572	475.958	629.557	0.0245975	-0.403503	GATAD2A	XM_021083423	XM_021083423.1	GATA zinc finger domain containing 2A, transcript variant X1	ENSSSCG00000013938
2vs1	gene24806	625.915	829.011	0.0208374	-0.405425	RNPEPL1	XM_003133801	XM_003133801.3	arginyl aminopeptidase like 1	ENSSSCG00000016367
2vs1	gene4992	2854.59	3805.67	0.028268	-0.41487	DIAPH1	XM_021077845	XM_021077845.1	diaphanous related formin 1, transcript variant X2
2vs1	gene4325	386.092	514.982	0.0224325	-0.415579	HCN2	XM_021084305	XM_021084305.1	hyperpolarization activated cyclic nucleotide gated potassium channel 2	ENSSSCG00000033442
2vs1	gene16620	2551.01	3406.7	8.86016e-05	-0.417306	SLC37A4	XM_021102040	XM_021102040.1	solute carrier family 37 member 4, transcript variant X1	ENSSSCG00000015105
2vs1	gene22138	442.678	591.291	0.0286747	-0.41761	RHOBTB2	XM_021073203	XM_021073203.1	Rho related BTB domain containing 2, transcript variant X3	ENSSSCG00000009638
2vs1	gene12506	373.598	501.378	0.0404103	-0.424414	LRRC42	XM_021096606	XM_021096606.1	leucine rich repeat containing 42, transcript variant X1	ENSSSCG00000029698
2vs1	gene20219	1524.82	2056.58	0.0163163	-0.431605	KCNJ12	XM_021068062	XM_021068062.1	potassium voltage-gated channel subfamily J member 12, transcript variant X1
2vs1	gene23154	5055.34	6828.5	0.00373098	-0.43376	C14H10orf71	XM_013983450	XM_013983450.2	chromosome 14 C10orf71 homolog
2vs1	gene10954	2459.71	3326.07	3.9968e-15	-0.435327	ARHGAP35	XM_021094622	XM_021094622.1	Rho GTPase activating protein 35	ENSSSCG00000003107
2vs1	gene5436	824.636	1118.96	0.00296815	-0.440329	LIMK1	XM_021086335	XM_021086335.1	LIM domain kinase 1, transcript variant X1	ENSSSCG00000030378
2vs1	gene23344	205.934	279.858	0.0431853	-0.442508	UBTD1	XM_021074394	XM_021074394.1	ubiquitin domain containing 1, transcript variant X5	ENSSSCG00000010521
2vs1	gene13857	226.824	311.033	0.0443145	-0.455494	TMEM266	XM_001928832	XM_001928832.6	transmembrane protein 266, transcript variant X1	ENSSSCG00000001863
2vs1	gene22914	1416.13	1958.71	0.04322	-0.467956	ARID5B	XM_021072755	XM_021072755.1	AT-rich interaction domain 5B, transcript variant X1	ENSSSCG00000010219
2vs1	gene26587	4244.21	5884.9	0.00882667	-0.471524	LMOD2	XM_003134726	XM_003134726.4	leiomodin 2	ENSSSCG00000016605
2vs1	gene11305	157.393	220.046	0.0434465	-0.483434	ZNF628	XM_021097575	XM_021097575.1	zinc finger protein 628
2vs1	gene10752	1116.33	1564.08	9.17286e-06	-0.486548	DYRK1B	XM_021094374	XM_021094374.1	dual specificity tyrosine phosphorylation regulated kinase 1B, transcript variant X5	ENSSSCG00000027197
2vs1	gene2982	1065.11	1499.21	0.0139939	-0.493202	SMTNL1	XM_021083035	XM_021083035.1	smoothelin like 1
2vs1	gene6966	226.056	320.014	0.0261401	-0.501456	SCRIB	XM_021090546	XM_021090546.1	scribbled planar cell polarity protein	ENSSSCG00000039466
2vs1	gene5451	983.214	1397.53	0.00257713	-0.507297	CASTOR2	XM_003481005	XM_003481005.4	cytosolic arginine sensor for mTORC1 subunit 2	ENSSSCG00000024045
2vs1	gene23261	4769.96	6836.64	0.0406779	-0.519311	PPP1R3C	XM_005671280	XM_005671280.3	protein phosphatase 1 regulatory subunit 3C	ENSSSCG00000010464
2vs1	gene22118	340.298	487.756	0.0236878	-0.519359	HR	NM_001083930	NM_001083930.1	HR, lysine demethylase and nuclear receptor corepressor	ENSSSCG00000009616
2vs1	gene3110	610.598	879.428	0.0437133	-0.526344	C2H11orf96	XM_021085053	XM_021085053.1	chromosome 2 C11orf96 homolog
2vs1	gene5095	3506.1	5105.23	9.93417e-06	-0.542109	SYNPO	XM_021085030	XM_021085030.1	synaptopodin	ENSSSCG00000038453
2vs1	gene20086	2659.24	3875.58	8.46519e-07	-0.543396	DHRS7C	XM_005669235	XM_005669235.3	dehydrogenase/reductase 7C, transcript variant X2	ENSSSCG00000017996
2vs1	gene7763	1138.74	1674.48	0.00550749	-0.556273	PEX19	XM_001928869	XM_001928869.5	peroxisomal biogenesis factor 19, transcript variant X1	ENSSSCG00000023091
2vs1	gene3235	1485.81	2245.96	0.0456175	-0.596084	CSRP3	NM_001172368	NM_001172368.1	cysteine and glycine rich protein 3	ENSSSCG00000013354
2vs1	gene7111	352.802	582.742	0.0119418	-0.723996	FBXO32	NM_001044588	NM_001044588.1	F-box protein 32	ENSSSCG00000005981
2vs1	gene20380	514.587	927.739	0.0444732	-0.850304	CSRNP1	XM_003132123	XM_003132123.4	cysteine and serine rich nuclear protein 1	ENSSSCG00000011264
2vs1	gene28900	39.8591	83.9371	0.0475558	-1.0744	LOC106508719			immunoglobulin heavy constant delta-like, transcript variant
2vs1	gene28136	25.889	153.805	0.0452012	-2.57069	EIF1AY	XM_013991067	XM_013991067.2	eukaryotic translation initiation factor 1A, Y-linked, transcript variant X1	ENSSSCG00000037509
2vs1	gene28139	24.7214	158.432	0.0332615	-2.68003	LOC100624329	XM_013991057	XM_013991057.2	zinc finger X-chromosomal protein, transcript variant X13	ENSSSCG00000012179
2vs1	gene28132	41.9593	380.357	0.027843	-3.18029	LOC100625207	XM_021080952	XM_021080952.1	probable ubiquitin carboxyl-terminal hydrolase FAF-X, transcript variant X1	ENSSSCG00000027046
2vs1	gene28138	77.6695	842.991	0.026779	-3.4401	LOC100624149	XM_005657947	XM_005657947.3	eukaryotic translation initiation factor 2 subunit 3, transcript variant X2	ENSSSCG00000012178
2vs1	gene28129	79.9886	924.183	0.0291204	-3.53031	LOC100624590	XM_013991065	XM_013991065.2	ATP-dependent RNA helicase DDX3X, transcript variant X2	ENSSSCG00000026430
3vs1	gene13310	137.784	55.3262	0.0230631	1.31638	C4A	NM_001123089	NM_001123089.2	complement C4A (Rodgers blood group)	ENSSSCG00000001427
3vs1	gene9571	242.93	118.418	0.0158483	1.03665	CD163	XM_021091121	XM_021091121.1	CD163 molecule, transcript variant X2	ENSSSCG00000033146
3vs1	gene12437	587.412	322.829	0.0116013	0.863603	LOC100624077	XM_005658141	XM_005658141.3	endogenous retrovirus group V member 2 Env polyprotein, transcript variant X1	ENSSSCG00000031640
3vs1	gene24528	2136.47	1271.9	4.09672e-14	0.748238	FN1	XM_003133642	XM_003133642.5	fibronectin 1	ENSSSCG00000016174
3vs1	gene7142	703.123	461.14	0.0114418	0.608573	COL14A1	XM_013996512	XM_013996512.2	collagen type XIV alpha 1 chain, transcript variant X1
3vs1	gene24339	11524.2	7659.26	0	0.589389	COL3A1	NM_001243297	NM_001243297.1	collagen type III alpha 1 chain	ENSSSCG00000016034
3vs1	gene16994	4672.81	3168.6	0.00888882	0.560446	COL1A2	NM_001243655	NM_001243655.1	collagen type I alpha 2 chain	ENSSSCG00000015326
3vs1	gene21523	1503.08	1033.15	3.13684e-07	0.540877	FSTL1	XM_021070306	XM_021070306.1	follistatin like 1, transcript variant X1	ENSSSCG00000039426
3vs1	gene24340	835.845	582.971	0.0110796	0.519812	COL5A2	XM_021074694	XM_021074694.1	collagen type V alpha 2 chain, transcript variant X1	ENSSSCG00000016035
3vs1	gene21587	1138.47	804.316	0.0213135	0.501264	CCDC80	XM_003132680	XM_003132680.4	coiled-coil domain containing 80	ENSSSCG00000011928
3vs1	gene2121	9425.11	6922.09	1.59872e-14	0.445302	GSN	XR_002337470	XR_002337470.1	gelsolin, transcript variant X6	ENSSSCG00000037508
3vs1	gene9947	3582.23	2661.12	0.0352924	0.428824	DCN	NM_213920	NM_213920.1	decorin	ENSSSCG00000000915
3vs1	gene25338	7288.96	5725.74	0.0172294	0.348251	SPARC	NM_001031794	NM_001031794.1	secreted protein acidic and cysteine rich	ENSSSCG00000017082
3vs1	gene19986	5146.15	5574.98	0.0334825	-0.115475	EIF5A	XM_021067817	XM_021067817.1	eukaryotic translation initiation factor 5A, transcript variant X4	ENSSSCG00000038359
3vs1	gene27455	14078.1	15327	0.0462699	-0.122624	PHKA1	XM_021080697	XM_021080697.1	phosphorylase kinase regulatory subunit alpha 1, transcript variant X7	ENSSSCG00000012411
3vs1	gene4820	7176.7	7860.92	0.0336988	-0.131378	VDAC1	XM_005652948	XM_005652948.3	voltage dependent anion channel 1, transcript variant X4	ENSSSCG00000014296
3vs1	gene5096	9593.98	10539.5	0.033886	-0.135607	MYOZ3	XM_021082327	XM_021082327.1	myozenin 3, transcript variant X4	ENSSSCG00000035729
3vs1	gene24504	180150	198204	0.0399404	-0.137786	MYL1	NM_214374	NM_214374.2	myosin light chain 1
3vs1	gene4160	10107.1	11176.3	0.0152767	-0.145086	FEM1A	XM_021084041	XM_021084041.1	fem-1 homolog A	ENSSSCG00000037153
3vs1	gene28037	14595.6	16155.7	0.036596	-0.14651	RPL10	NM_001044543	NM_001044543.1	ribosomal protein L10	ENSSSCG00000035997
3vs1	gene22503	12886.3	14268.5	0.0188539	-0.146991	RPLP0	NM_001098598	NM_001098598.1	ribosomal protein lateral stalk subunit P0	ENSSSCG00000036014
3vs1	gene8984	2781.26	3082.16	0.0486793	-0.148203	ATP5G2	XM_021091719	XM_021091719.1	ATP synthase, H+ transporting, mitochondrial Fo complex subunit C2 (subunit 9), transcript variant X2	ENSSSCG00000033368
3vs1	gene5911	15353.5	17014.7	0.0152788	-0.148216	RPS2	XM_021086796	XM_021086796.1	ribosomal protein S2	ENSSSCG00000033697
3vs1	gene20627	4031.55	4481.61	0.0474169	-0.152685	RPL29	XM_005669562	XM_005669562.3	ribosomal protein L29, transcript variant X1	ENSSSCG00000027573
3vs1	gene7611	6608.03	7350.09	0.0215228	-0.153541	DCAF6	XM_021089469	XM_021089469.1	DDB1 and CUL4 associated factor 6, transcript variant X19	ENSSSCG00000006303
3vs1	gene20534	3238.14	3606.95	0.0461317	-0.155612	ARIH2	XM_003132197	XM_003132197.6	ariadne RBR E3 ubiquitin protein ligase 2, transcript variant X1	ENSSSCG00000011367
3vs1	gene21314	2915.22	3251.51	0.048846	-0.157506	PSMD2	NM_001243477	NM_001243477.1	proteasome 26S subunit, non-ATPase 2	ENSSSCG00000023998
3vs1	gene22515	3127.78	3489.43	0.0347586	-0.157852	RNF10	XM_013982944	XM_013982944.2	ring finger protein 10, transcript variant X1	ENSSSCG00000009910
3vs1	gene6916	5207.37	5826.38	0.0229839	-0.162044	RPL8	XM_005655297	XM_005655297.3	ribosomal protein L8	ENSSSCG00000029830
3vs1	gene20389	3835.21	4297.35	0.0348815	-0.16414	RPSA	NM_001037146	NM_001037146.2	ribosomal protein SA	ENSSSCG00000037236
3vs1	gene2717	193519	216955	0.0302752	-0.164921	PYGM	XM_003122588	XM_003122588.5	glycogen phosphorylase, muscle associated	ENSSSCG00000013022
3vs1	gene20857	3316.27	3718.26	0.0174721	-0.165065	RAF1	XM_021069350	XM_021069350.1	Raf-1 proto-oncogene, serine/threonine kinase, transcript variant X4	ENSSSCG00000024453
3vs1	gene10903	401348	450517	0.0252993	-0.166728	CKM	XM_021093542	XM_021093542.1	creatine kinase, M-type, transcript variant X2	ENSSSCG00000036132
3vs1	gene16232	6183.64	6947.4	0.0210741	-0.168017	RPS3	XM_021102268	XM_021102268.1	ribosomal protein S3, transcript variant X2	ENSSSCG00000014855
3vs1	gene24961	3226.67	3631.06	0.0496669	-0.170341	RPL37	NM_001243603	NM_001243603.1	ribosomal protein L37	ENSSSCG00000033326
3vs1	gene24665	2542.26	2862.18	0.0483495	-0.171002	TRIP12	XM_021075059	XM_021075059.1	thyroid hormone receptor interactor 12, transcript variant X3	ENSSSCG00000024373
3vs1	gene2040	5161.63	5813.03	0.0336153	-0.171462	KIAA0368	XM_021067464	XM_021067464.1	KIAA0368 ortholog, transcript variant X3	ENSSSCG00000005459
3vs1	gene19981	2264.01	2550.79	0.0460271	-0.172063	GABARAP	NM_001190288	NM_001190288.1	GABA type A receptor-associated protein
3vs1	gene19723	1913.68	2158.22	0.0223584	-0.173489	POLDIP2	XM_003358174	XM_003358174.5	DNA polymerase delta interacting protein 2	ENSSSCG00000028920
3vs1	gene24547	1268.89	1431.22	0.0495245	-0.173687	ARPC2	NM_001190239	NM_001190239.1	actin related protein 2/3 complex subunit 2	ENSSSCG00000016185
3vs1	gene11570	2506.15	2827.12	0.0181773	-0.173863	PARK7	NM_001078663	NM_001078663.1	Parkinsonism associated deglycase	ENSSSCG00000003385
3vs1	gene5592	172377	194706	0.0190548	-0.175725	ATP2A1	XM_021085681	XM_021085681.1	ATPase sarcoplasmic/endoplasmic reticulum Ca2+ transporting 1, transcript variant X1	ENSSSCG00000007805
3vs1	gene3796	4110.58	4644.75	0.0231829	-0.176261	TECR	XM_021083691	XM_021083691.1	trans-2,3-enoyl-CoA reductase, transcript variant X2	ENSSSCG00000031299
3vs1	gene24536	3278.61	3708.16	0.0486218	-0.177623	RPL37A	XM_021076246	XM_021076246.1	ribosomal protein L37a, transcript variant X2	ENSSSCG00000036716
3vs1	gene2618	94427.6	106899	0.00771407	-0.178971	ACTN3	XM_003122492	XM_003122492.4	actinin alpha 3, transcript variant X2	ENSSSCG00000038323
3vs1	gene3985	1991.4	2254.73	0.0384595	-0.179169	EIF3G	XM_021083783	XM_021083783.1	eukaryotic translation initiation factor 3 subunit G	ENSSSCG00000013661;ENSSSCG00000024072
3vs1	gene25806	2003.81	2269.6	0.0482826	-0.179688	SNTA1	XM_003359945	XM_003359945.5	syntrophin alpha 1
3vs1	gene28844	3829.38	4337.98	0.0312838	-0.179913	EIF5	XM_021081662	XM_021081662.1	eukaryotic translation initiation factor 5, transcript variant X2
3vs1	gene3250	109690	124395	0.0207255	-0.181493	LDHA	XM_013994501	XM_013994501.2	lactate dehydrogenase A, transcript variant X1	ENSSSCG00000013366
3vs1	gene6154	3204.72	3635.18	0.0406476	-0.181828	RPL31	XM_005662362	XM_005662362.3	ribosomal protein L31	ENSSSCG00000008170
3vs1	gene12639	4928.19	5591.17	0.0321744	-0.182093	RPS8	XM_003128060	XM_003128060.4	ribosomal protein S8	ENSSSCG00000003930
3vs1	gene21062	4684.93	5320.18	0.0141778	-0.183446	GYG1	XM_021069597	XM_021069597.1	glycogenin 1, transcript variant X2	ENSSSCG00000011698
3vs1	gene20010	2197.21	2499.33	0.0368803	-0.185868	FXR2	XM_003131974	XM_003131974.5	FMR1 autosomal homolog 2	ENSSSCG00000017953
3vs1	gene25993	110366	125546	0.025406	-0.185925	TNNC2	NM_001001862	NM_001001862.1	troponin C2, fast skeletal type
3vs1	gene6480	3586.13	4084.06	0.0335119	-0.187575	RPS27A	XM_003125136	XM_003125136.5	ribosomal protein S27a	ENSSSCG00000034617
3vs1	gene3836	5293.99	6030.64	0.037058	-0.187954	NFIX	XM_021083712	XM_021083712.1	nuclear factor I X, transcript variant X8	ENSSSCG00000013742
3vs1	gene8243	15698.4	17892.9	0.0352383	-0.18877	CSDE1	XM_003481484	XM_003481484.4	cold shock domain containing E1, transcript variant X1	ENSSSCG00000006752
3vs1	gene4187	2456.56	2800.37	0.0184406	-0.188976	MAP2K2	NM_001244550	NM_001244550.1	mitogen-activated protein kinase kinase 2	ENSSSCG00000027127
3vs1	gene11673	3286.57	3748.31	0.0482229	-0.189657	PLEKHM2	XM_021095385	XM_021095385.1	pleckstrin homology and RUN domain containing M2, transcript variant X1	ENSSSCG00000003468
3vs1	gene12698	9563.05	10918.8	0.0486712	-0.19127	YBX1	XM_021096922	XM_021096922.1	Y-box binding protein 1	ENSSSCG00000028485
3vs1	gene1740	2798.82	3195.7	0.0494922	-0.191312	VLDLR	XM_013993593	XM_013993593.2	very low density lipoprotein receptor, transcript variant X1	ENSSSCG00000005229;ENSSSCG00000040670
3vs1	gene10091	3376.62	3861.9	0.0472959	-0.193731	LOC100624067	XM_021093705	XM_021093705.1	cytochrome c oxidase subunit 4 isoform 1, mitochondrial, transcript variant X1	ENSSSCG00000029034
3vs1	gene8979	3416.2	3907.56	0.0363439	-0.193874	PCBP2	XM_021091183	XM_021091183.1	poly(rC) binding protein 2, transcript variant X2	ENSSSCG00000000274
3vs1	gene10594	1754.37	2006.97	0.0489167	-0.194063	SCN1B	XM_021097212	XM_021097212.1	sodium voltage-gated channel beta subunit 1, transcript variant X2	ENSSSCG00000023267
3vs1	gene25819	1542.8	1765.11	0.0486152	-0.194204	EIF2S2	XM_001929150	XM_001929150.6	eukaryotic translation initiation factor 2 subunit beta	ENSSSCG00000026617
3vs1	gene9705	1427.92	1634.25	0.0341392	-0.194721	BCL2L13	XM_003126595	XM_003126595.6	BCL2 like 13, transcript variant X1	ENSSSCG00000040373
3vs1	gene27748	2465.02	2822.94	0.0486325	-0.1956	RPL39	XM_005673863	XM_005673863.3	ribosomal protein L39	ENSSSCG00000030849
3vs1	gene24423	3295.21	3779.94	0.0194161	-0.197993	STRADB	XM_003133587	XM_003133587.5	STE20-related kinase adaptor beta, transcript variant X1
3vs1	gene16618	3258.79	3738.9	0.0481977	-0.198281	RPS25	XM_003129920	XM_003129920.3	ribosomal protein S25, transcript variant X2	ENSSSCG00000036296
3vs1	gene9509	35921.1	41254	0.00738092	-0.199702	YBX3	XM_003126475	XM_003126475.3	Y-box binding protein 3, transcript variant X1	ENSSSCG00000000633
3vs1	gene17187	1740.15	1998.61	0.0356899	-0.199787	PSMC2	NM_001245008	NM_001245008.1	proteasome 26S subunit, ATPase 2	ENSSSCG00000015424
3vs1	gene19682	3092.12	3551.61	0.0211716	-0.199879	PSMD11	XM_021067450	XM_021067450.1	proteasome 26S subunit, non-ATPase 11	ENSSSCG00000017731
3vs1	gene22486	5735.27	6589.71	0.0212691	-0.200353	RPL6	NM_001044542	NM_001044542.1	ribosomal protein L6	ENSSSCG00000039130
3vs1	gene6385	2896.85	3328.9	0.0368387	-0.200561	PPP3R1	XM_021087426	XM_021087426.1	protein phosphatase 3 regulatory subunit B, alpha	ENSSSCG00000036115
3vs1	gene5486	2253.98	2590.72	0.0489243	-0.200878	NIPSNAP2	XM_021086363	XM_021086363.1	nipsnap homolog 2	ENSSSCG00000036659
3vs1	gene22866	668056	768484	0.0151936	-0.202046	ACTA1	XM_005670976	XM_005670976.2	actin, alpha 1, skeletal muscle, transcript variant X3
3vs1	gene6360	3570.62	4108.69	0.0165707	-0.202506	PCBP1	XM_003125057	XM_003125057.4	poly(rC) binding protein 1	ENSSSCG00000027224
3vs1	gene26209	51508.4	59295.2	0.0139348	-0.203106	EEF1A2	XM_021077778	XM_021077778.1	eukaryotic translation elongation factor 1 alpha 2	ENSSSCG00000040401
3vs1	gene18822	1037.15	1194.69	0.0487269	-0.204011	NPLOC4	XM_021066476	XM_021066476.1	NPL4 homolog, ubiquitin recognition factor	ENSSSCG00000024235
3vs1	gene1127	1894.58	2183	0.0228802	-0.204432	LRRC28	XM_001925096	XM_001925096.7	leucine rich repeat containing 28, transcript variant X1	ENSSSCG00000004814
3vs1	gene13397	2510.9	2894.16	0.0149881	-0.204943	RPS18	NM_213940	NM_213940.1	ribosomal protein S18	ENSSSCG00000001502
3vs1	gene25507	3202.29	3693.5	0.0246668	-0.205885	VDAC3	XM_021077308	XM_021077308.1	voltage dependent anion channel 3, transcript variant X2
3vs1	gene1313	8816.45	10169.7	0.0150996	-0.206004	RPL4	XM_005659862	XM_005659862.3	ribosomal protein L4	ENSSSCG00000004945
3vs1	gene8689	1517.9	1751.48	0.0458037	-0.206505	SNU13	NM_001190226	NM_001190226.1	small nuclear ribonucleoprotein 13, transcript variant 1	ENSSSCG00000000058
3vs1	gene13891	2228.88	2573.04	0.0366942	-0.207151	LOC100156967	XM_005666147	XM_005666147.2	cytochrome c oxidase subunit 5A, mitochondrial	ENSSSCG00000024316
3vs1	gene14102	1344.08	1552.2	0.0486214	-0.207689	PSMB5	XM_001924445	XM_001924445.4	proteasome subunit beta 5
3vs1	gene5971	970.439	1120.79	0.0473791	-0.207806	STUB1	XM_003124708	XM_003124708.5	STIP1 homology and U-box containing protein 1	ENSSSCG00000007988;ENSSSCG00000008008
3vs1	gene10041	2109.59	2439.77	0.0222673	-0.209779	RPL13	XM_013994186	XM_013994186.2	ribosomal protein L13, transcript variant X1	ENSSSCG00000024974
3vs1	gene5508	1220.83	1412.28	0.0365174	-0.210165	BCKDK	XM_003124471	XM_003124471.6	branched chain ketoacid dehydrogenase kinase	ENSSSCG00000007763
3vs1	gene2392	6983.58	8078.82	0.00966204	-0.210179	RPL7A	XM_021071136	XM_021071136.1	ribosomal protein L7a
3vs1	gene5545	177016	204829	0.0153382	-0.210539	MYLPF	NM_001006592	NM_001006592.1	myosin light chain, phosphorylatable, fast skeletal muscle	ENSSSCG00000007799
3vs1	gene20067	4446.8	5148.94	0.0242208	-0.21151	RPL26	NM_001243458	NM_001243458.1	ribosomal protein L26	ENSSSCG00000028850
3vs1	gene4531	2593.47	3003.23	0.0201763	-0.211635	RPS23	NM_213764	NM_213764.1	ribosomal protein S23	ENSSSCG00000014133
3vs1	gene10622	1605.44	1859.45	0.0493469	-0.211902	COX6B	XM_005664497	XM_005664497.3	COX6B protein, transcript variant X1	ENSSSCG00000002907
3vs1	gene2492	74088.8	85820.8	0.023076	-0.212071	TNNI2	NM_001032359	NM_001032359.1	troponin I2, fast skeletal type	ENSSSCG00000033260
3vs1	gene10742	4505.42	5219.85	0.0163583	-0.212345	RPS16	NM_001137620	NM_001137620.1	ribosomal protein S16	ENSSSCG00000020817
3vs1	gene8063	13546.8	15697.8	0.0133552	-0.212606	TMOD4	XM_005663458	XM_005663458.3	tropomodulin 4, transcript variant X1	ENSSSCG00000006631
3vs1	gene17402	1840.77	2133.71	0.048627	-0.213056	C9H1orf21	XM_003482739	XM_003482739.3	chromosome 9 C1orf21 homolog, transcript variant X1	ENSSSCG00000015565
3vs1	gene14969	3140.13	3641.06	0.0356689	-0.213537	RPL9	NM_001243481	NM_001243481.1	ribosomal protein L9
3vs1	gene19097	2349.69	2724.87	0.0207998	-0.213712	PSMC5	XM_021066210	XM_021066210.1	proteasome 26S subunit, ATPase 5, transcript variant X3	ENSSSCG00000017287
3vs1	gene12106	10262.9	11905.4	0.0108216	-0.214174	VAPA	XM_021096053	XM_021096053.1	VAMP associated protein A, transcript variant X1	ENSSSCG00000038465
3vs1	gene14391	1538.98	1785.73	0.0354855	-0.214541	CHURC1	XM_013978294	XM_013978294.2	churchill domain containing 1, transcript variant X2	ENSSSCG00000022147
3vs1	gene24998	1340.42	1555.34	0.0268238	-0.214544	PAIP1	XM_005657616	XM_005657616.3	poly(A) binding protein interacting protein 1, transcript variant X3	ENSSSCG00000016874
3vs1	gene11052	7553.05	8766.44	0.0212648	-0.214933	RPS11	NM_001244070	NM_001244070.1	ribosomal protein S11	ENSSSCG00000003165
3vs1	gene22079	1693.31	1965.6	0.0352249	-0.215121	SEMA4D	XM_021073817	XM_021073817.1	semaphorin 4D, transcript variant X10	ENSSSCG00000009584
3vs1	gene8296	2272.75	2639.05	0.035799	-0.215584	ATP5F1	XM_003355244	XM_003355244.5	ATP synthase, H+ transporting, mitochondrial Fo complex subunit B1	ENSSSCG00000037772
3vs1	gene12116	1469.89	1708.03	0.0344424	-0.216617	NDUFV2	NM_001097475	NM_001097475.2	NADH:ubiquinone oxidoreductase core subunit V2	ENSSSCG00000038826
3vs1	gene17039	3842.93	4466.15	0.0337241	-0.216824	NDUFA4	NM_001097468	NM_001097468.2	NDUFA4, mitochondrial complex associated	ENSSSCG00000024313
3vs1	gene18445	73914	85909.5	0.00949995	-0.21697	TPT1	NM_214373	NM_214373.1	tumor protein, translationally-controlled 1	ENSSSCG00000040929
3vs1	gene16620	2916.44	3389.84	0.0351072	-0.217012	SLC37A4	XM_021102040	XM_021102040.1	solute carrier family 37 member 4, transcript variant X1	ENSSSCG00000015105
3vs1	gene2256	2922.83	3399.04	0.0368665	-0.217762	RPL12	XM_005660442	XM_005660442.3	ribosomal protein L12
3vs1	gene11690	1766.25	2054.66	0.0175439	-0.218204	SZRD1	XM_005665044	XM_005665044.3	SUZ RNA binding domain containing 1	ENSSSCG00000031083
3vs1	gene9593	47539.8	55315	0.00787841	-0.218534	TPI1	NM_001037151	NM_001037151.1	triosephosphate isomerase 1
3vs1	gene10274	1253.62	1459.41	0.0370452	-0.219282	VPS4A	XM_005655767	XM_005655767.3	vacuolar protein sorting 4 homolog A, transcript variant X2	ENSSSCG00000025151
3vs1	gene19371	4525.9	5270.88	0.00834277	-0.21984	RPL19	XM_003131509	XM_003131509.5	ribosomal protein L19	ENSSSCG00000017509
3vs1	gene3054	1173.37	1366.55	0.0486224	-0.219888	NDUFS3	NM_001243796	NM_001243796.1	NADH:ubiquinone oxidoreductase core subunit S3	ENSSSCG00000032081
3vs1	gene1657	6403.39	7458.9	0.00824908	-0.220127	RPS6	XM_003121890	XM_003121890.4	ribosomal protein S6, transcript variant X1	ENSSSCG00000005169
3vs1	gene19939	211219	246128	0.0198328	-0.220673	ENO3	NM_001044527	NM_001044527.1	enolase 3
3vs1	gene7534	5338.55	6231.69	0.012267	-0.223177	RPS20	NM_001129954	NM_001129954.1	ribosomal protein S20
3vs1	gene24196	26859.7	31365.7	0.0479057	-0.223746	KLHL41	XM_003359548	XM_003359548.5	kelch like family member 41	ENSSSCG00000033049
3vs1	gene25349	687.228	802.551	0.0493466	-0.223805	TNIP1	XM_005672611	XM_005672611.3	TNFAIP3 interacting protein 1, transcript variant X7	ENSSSCG00000017091
3vs1	gene10752	1332.9	1556.87	0.0485159	-0.224076	DYRK1B	XM_021094374	XM_021094374.1	dual specificity tyrosine phosphorylation regulated kinase 1B, transcript variant X5	ENSSSCG00000027197
3vs1	gene22315	1374.76	1606.1	0.0204694	-0.22439	RAN	XM_021072701	XM_021072701.1	RAN, member RAS oncogene family	ENSSSCG00000009746
3vs1	gene2269	13586.5	15874.8	0.0152286	-0.224569	AK1	XM_003122177	XM_003122177.6	adenylate kinase 1, transcript variant X1	ENSSSCG00000005627
3vs1	gene742	3809.58	4454.09	0.0205569	-0.225498	RPL17	XM_021077855	XM_021077855.1	ribosomal protein L17, transcript variant X1	ENSSSCG00000035007
3vs1	gene4291	2290.22	2678.13	0.0190064	-0.225737	ATP5D	XM_003122991	XM_003122991.5	ATP synthase, H+ transporting, mitochondrial F1 complex, delta subunit
3vs1	gene8055	1178.76	1378.65	0.0452912	-0.22598	PSMB4	NM_001244455	NM_001244455.1	proteasome subunit beta 4
3vs1	gene11722	915.623	1071.18	0.0487065	-0.226369	MINOS1	XM_005656034	XM_005656034.2	mitochondrial inner membrane organizing system 1	ENSSSCG00000028414
3vs1	gene23460	4113.13	4812.42	0.0138305	-0.226527	NEURL1	XM_001926877	XM_001926877.5	neuralized E3 ubiquitin protein ligase 1, transcript variant X5	ENSSSCG00000010603
3vs1	gene21901	2555.11	2990.36	0.0194424	-0.226931	ATP5O	NM_001044606	NM_001044606.2	ATP synthase, H+ transporting, mitochondrial F1 complex, O subunit	ENSSSCG00000012042
3vs1	gene28865	7330.24	8580.1	0.0184087	-0.227135	ADSSL1	NM_001097509	NM_001097509.1	adenylosuccinate synthase like 1
3vs1	gene28429	1728.22	2024.34	0.0173374	-0.22816	UBAC1	XM_021081204	XM_021081204.1	UBA domain containing 1, transcript variant X2
3vs1	gene3998	1571.18	1841.55	0.0150728	-0.229067	KEAP1	XM_005654811	XM_005654811.3	kelch like ECH associated protein 1, transcript variant X3	ENSSSCG00000023667
3vs1	gene2811	8251.15	9671.23	0.0165765	-0.229103	FTH1	XM_005660803	XM_005660803.3	ferritin heavy chain 1, transcript variant X1	ENSSSCG00000014540
3vs1	gene25498	7933.42	9299.55	0.0183328	-0.229219	ANK1	XM_021078313	XM_021078313.1	ankyrin 1	ENSSSCG00000007022
3vs1	gene8134	2492.88	2923.36	0.0487314	-0.229814	HFE2	XM_005663519	XM_005663519.3	hemochromatosis type 2 (juvenile), transcript variant X1	ENSSSCG00000035429
3vs1	gene20143	10266	12044.4	0.018592	-0.230485	UBB	XM_005653994	XM_005653994.3	ubiquitin B, transcript variant X1
3vs1	gene19276	14106.1	16555.2	0.00801332	-0.230963	EIF1	XM_003482982	XM_003482982.4	eukaryotic translation initiation factor 1	ENSSSCG00000017430
3vs1	gene3059	1781.61	2091.02	0.022604	-0.231021	PSMC3	XM_003122809	XM_003122809.3	proteasome 26S subunit, ATPase 3, transcript variant X1
3vs1	gene24267	1158.2	1359.51	0.049138	-0.231202	HOXD8	XM_021076351	XM_021076351.1	homeobox D8, transcript variant X3	ENSSSCG00000040349
3vs1	gene19453	999.78	1173.61	0.0255044	-0.231266	PHB	XM_003131560	XM_003131560.6	prohibitin, transcript variant X1	ENSSSCG00000017549
3vs1	gene19942	1469.44	1724.95	0.0281026	-0.231287	SLC25A11	XM_021067766	XM_021067766.1	solute carrier family 25 member 11, transcript variant X1	ENSSSCG00000032472
3vs1	gene10604	1177.34	1382.11	0.024785	-0.231333	USF2	XM_003127041	XM_003127041.5	upstream transcription factor 2, c-fos interacting, transcript variant X4	ENSSSCG00000002885
3vs1	gene15372	5376.47	6316.93	0.0169731	-0.232565	RPS3A	NM_001137619	NM_001137619.1	ribosomal protein S3A	ENSSSCG00000009019
3vs1	gene821	196856	231322	6.95e-12	-0.232763	TPM1	XM_005659518	XM_005659518.3	tropomyosin 1 (alpha), transcript variant X7	ENSSSCG00000004570
3vs1	gene15686	5357.56	6296.5	0.0172302	-0.232974	PDLIM5	XM_021101756	XM_021101756.1	PDZ and LIM domain 5, transcript variant X10	ENSSSCG00000009192
3vs1	gene19085	1364.23	1604.58	0.0369821	-0.234114	TEX2	XM_021066767	XM_021066767.1	testis expressed 2	ENSSSCG00000017278
3vs1	gene21352	6911.73	8129.79	0.0253822	-0.234172	EIF4A2	XM_021068176	XM_021068176.1	eukaryotic translation initiation factor 4A2, transcript variant X3	ENSSSCG00000011803
3vs1	gene19935	4257.57	5009	0.0176538	-0.234493	KIF1C	XM_021067761	XM_021067761.1	kinesin family member 1C	ENSSSCG00000017900
3vs1	gene22707	1497.23	1761.96	0.0338851	-0.234884	CHCHD10	XM_001929468	XM_001929468.4	coiled-coil-helix-coiled-coil-helix domain containing 10	ENSSSCG00000010073
3vs1	gene26185	1718.42	2024.11	0.0480913	-0.236207	RPS21	NM_001097480	NM_001097480.2	ribosomal protein S21	ENSSSCG00000021825
3vs1	gene9704	801.028	943.675	0.0487076	-0.236439	ATP6V1E1	XM_003126593	XM_003126593.6	ATPase H+ transporting V1 subunit E1	ENSSSCG00000000767
3vs1	gene13424	3591.58	4231.73	0.00730319	-0.236629	RPS10	NM_001244106	NM_001244106.1	ribosomal protein S10	ENSSSCG00000001528
3vs1	gene13428	6418.96	7564.58	0.0165741	-0.236921	C7H6orf106	NM_001243026	NM_001243026.1	chromosome 7 C6orf106 homolog	ENSSSCG00000001527
3vs1	gene15827	1239.86	1461.32	0.0360539	-0.237095	TMEM9B	XM_005667042	XM_005667042.3	TMEM9 domain family member B, transcript variant X3
3vs1	gene15642	1266.34	1492.66	0.0247791	-0.237217	UBE2D3	NM_001078673	NM_001078673.1	ubiquitin conjugating enzyme E2 D3
3vs1	gene16671	19496.2	22998.7	0.0173808	-0.238361	HSPA8	NM_001243907	NM_001243907.1	heat shock protein family A (Hsp70) member 8
3vs1	gene20397	4353.16	5139.13	0.0476273	-0.239462	RPL14	XM_021068170	XM_021068170.1	ribosomal protein L14, transcript variant X1	ENSSSCG00000011272
3vs1	gene10516	8564.73	10115.3	0.0195126	-0.240061	PHKB	XM_021094236	XM_021094236.1	phosphorylase kinase regulatory subunit beta, transcript variant X4	ENSSSCG00000002844
3vs1	gene11940	1078.06	1273.36	0.0487064	-0.240199	EIF3I	NM_001244624	NM_001244624.1	eukaryotic translation initiation factor 3 subunit I	ENSSSCG00000003612
3vs1	gene2690	2028.86	2397.31	0.0173384	-0.240745	FAU	XM_021082866	XM_021082866.1	FAU, ubiquitin like and ribosomal protein S30 fusion
3vs1	gene4352	4680.24	5533.37	0.023093	-0.241576	SQSTM1	XM_003123639	XM_003123639.4	sequestosome 1, transcript variant X1
3vs1	gene27246	2202.25	2604.25	0.00487008	-0.241888	ARAF	NM_214329	NM_214329.1	A-Raf proto-oncogene, serine/threonine kinase	ENSSSCG00000012275
3vs1	gene13442	4306.69	5093.88	0.0172524	-0.242184	RPL10A	NM_001097477	NM_001097477.2	ribosomal protein L10a	ENSSSCG00000001543
3vs1	gene4064	3498.77	4138.95	0.0202918	-0.242416	RPS28	XM_013987364	XM_013987364.2	ribosomal protein S28, transcript variant X1	ENSSSCG00000013597
3vs1	gene11051	4571.19	5408.19	0.0250699	-0.242576	RPL13A	XM_003127307	XM_003127307.4	ribosomal protein L13a, transcript variant X10	ENSSSCG00000003167
3vs1	gene6976	2593.13	3068.44	0.0464257	-0.242814	EEF1D	XM_021090459	XM_021090459.1	eukaryotic translation elongation factor 1 delta, transcript variant X2	ENSSSCG00000006954
3vs1	gene8478	4562.39	5401.29	0.0147505	-0.243514	RPL5	NM_001114284	NM_001114284.2	ribosomal protein L5	ENSSSCG00000006899
3vs1	gene24478	1569.86	1860.17	0.03349	-0.2448	CCNYL1	XM_005672131	XM_005672131.3	cyclin Y like 1, transcript variant X2	ENSSSCG00000024696
3vs1	gene13242	1047.7	1242.65	0.0337254	-0.246185	FLOT1	XM_005665748	XM_005665748.3	flotillin 1, transcript variant X1	ENSSSCG00000022725
3vs1	gene3853	1039.56	1233.62	0.0412662	-0.246918	ASNA1	XM_003123324	XM_003123324.4	arsA arsenite transporter, ATP-binding, homolog 1 (bacterial)	ENSSSCG00000038776
3vs1	gene5209	725.853	861.543	0.0489626	-0.247246	LOC110260073	XM_021087965	XM_021087965.1	alpha-2C adrenergic receptor-like	ENSSSCG00000032626
3vs1	gene22358	1233.29	1464.18	0.0381178	-0.247581	RILPL1	XM_001925355	XM_001925355.7	Rab interacting lysosomal protein like 1, transcript variant X2	ENSSSCG00000009773
3vs1	gene23977	9625.65	11429.6	0.015279	-0.247816	SLC25A4	XM_003133345	XM_003133345.4	solute carrier family 25 member 4	ENSSSCG00000015790
3vs1	gene5247	1449.77	1721.68	0.0209725	-0.24799	ATP5J2	NM_001097464	NM_001097464.1	ATP synthase, H+ transporting, mitochondrial Fo complex subunit F2	ENSSSCG00000034019
3vs1	gene4271	3008.57	3573.11	0.0142519	-0.248104	MBD3	XM_003122994	XM_003122994.4	methyl-CpG binding domain protein 3, transcript variant X4	ENSSSCG00000013435
3vs1	gene11786	2828.86	3359.84	0.0152152	-0.248169	RPL11	NM_001001638	NM_001001638.1	ribosomal protein L11	ENSSSCG00000024260
3vs1	gene23392	4761.01	5656.22	0.00648826	-0.248568	HIF1AN	XM_003125588	XM_003125588.4	hypoxia inducible factor 1 alpha subunit inhibitor	ENSSSCG00000010555
3vs1	gene17839	939.908	1116.68	0.0341761	-0.24862	UBQLN1	XM_021064658	XM_021064658.1	ubiquilin 1, transcript variant X1
3vs1	gene10826	4763.16	5661.14	0.0205926	-0.249174	RPS19	XM_005655906	XM_005655906.3	ribosomal protein S19, transcript variant X1	ENSSSCG00000003042
3vs1	gene2791	1726.01	2052.02	0.0327687	-0.249603	UBXN1	XM_005660790	XM_005660790.3	UBX domain protein 1, transcript variant X2	ENSSSCG00000023110
3vs1	gene17710	907.208	1078.64	0.0486685	-0.249702	NEK7	XM_005667989	XM_005667989.3	NIMA related kinase 7, transcript variant X2	ENSSSCG00000010904
3vs1	gene2431	2372.43	2821.73	0.0338073	-0.250215	COX8H	NM_001097500	NM_001097500.2	COX8H protein	ENSSSCG00000014560
3vs1	gene19438	1883.24	2244.05	0.0311404	-0.25289	ATP5G1	XM_005653955	XM_005653955.2	ATP synthase, H+ transporting, mitochondrial Fo complex subunit C1 (subunit 9), transcript variant X2	ENSSSCG00000017544
3vs1	gene22616	1084.13	1292.01	0.0486208	-0.253087	UQCR10	NM_001129978	NM_001129978.2	ubiquinol-cytochrome c reductase complex 7.2 kDa protein	ENSSSCG00000024550
3vs1	gene9669	1710.05	2038.12	0.0149076	-0.253205	FKBP4	NM_001195337	NM_001195337.2	FK506 binding protein 4	ENSSSCG00000000743
3vs1	gene2228	3026.24	3606.85	0.0152782	-0.253214	RPL35	NM_214326	NM_214326.2	ribosomal protein L35	ENSSSCG00000034227
3vs1	gene2646	2552.07	3041.76	0.000220169	-0.253238	BANF1	XM_005660673	XM_005660673.3	barrier to autointegration factor 1, transcript variant X1	ENSSSCG00000012961
3vs1	gene16598	1393.43	1660.89	0.036741	-0.253311	ATP5L	NM_001244137	NM_001244137.1	ATP synthase, H+ transporting, mitochondrial Fo complex subunit G	ENSSSCG00000034527
3vs1	gene2469	1847.02	2204.24	0.0206004	-0.255084	RPLP2	NM_001244866	NM_001244866.1	ribosomal protein lateral stalk subunit P2	ENSSSCG00000012842
3vs1	gene10077	1289	1538.4	0.0302158	-0.255182	MAP1LC3B	NM_001190290	NM_001190290.1	microtubule associated protein 1 light chain 3 beta	ENSSSCG00000002655
3vs1	gene19222	2718.19	3244.27	0.00459868	-0.255251	RPL27	NM_001097479	NM_001097479.1	ribosomal protein L27	ENSSSCG00000025507
3vs1	gene9584	816.604	975.611	0.0371201	-0.25667	PHB2	NM_001243556	NM_001243556.1	prohibitin 2	ENSSSCG00000024655
3vs1	gene5436	931.627	1113.84	0.0486445	-0.257724	LIMK1	XM_021086335	XM_021086335.1	LIM domain kinase 1, transcript variant X1	ENSSSCG00000030378
3vs1	gene10316	2048.1	2449.01	0.0151682	-0.257907	COQ9	XM_003355802	XM_003355802.4	coenzyme Q9	ENSSSCG00000025284
3vs1	gene10950	1937.32	2317.02	0.0148945	-0.258211	STRN4	XM_021094615	XM_021094615.1	striatin 4, transcript variant X1	ENSSSCG00000003104
3vs1	gene6951	1221.66	1461.61	0.0175914	-0.258713	MAF1	XM_003125444	XM_003125444.4	MAF1 homolog, negative regulator of RNA polymerase III	ENSSSCG00000005915
3vs1	gene3590	705.997	845.259	0.0383139	-0.259733	COPE	XM_003123536	XM_003123536.4	coatomer protein complex subunit epsilon	ENSSSCG00000027840
3vs1	gene40	1229.32	1473.16	0.0205599	-0.261061	MPC1	XM_005654340	XM_005654340.3	mitochondrial pyruvate carrier 1, transcript variant X2	ENSSSCG00000032916
3vs1	gene16332	950.048	1139	0.0463359	-0.261698	HIKESHI	XM_013979233	XM_013979233.2	Hikeshi, heat shock protein nuclear import factor	ENSSSCG00000021210
3vs1	gene4146	2361.36	2831.32	0.01927	-0.261856	RPL36	NM_001244687	NM_001244687.1	ribosomal protein L36
3vs1	gene5005	1309.81	1571.27	0.0148678	-0.262572	RNF14	XM_021084946	XM_021084946.1	ring finger protein 14, transcript variant X9	ENSSSCG00000014394
3vs1	gene18004	2170.51	2610.77	0.0212428	-0.266442	OPTN	XM_005656827	XM_005656827.3	optineurin, transcript variant X1	ENSSSCG00000023247
3vs1	gene8644	661.236	795.69	0.048615	-0.267042	SAMM50	XM_021091403	XM_021091403.1	SAMM50 sorting and assembly machinery component, transcript variant X1	ENSSSCG00000028346
3vs1	gene20861	3590.35	4322.84	0.00809555	-0.267857	RPL32	XM_021068582	XM_021068582.1	ribosomal protein L32, transcript variant X1	ENSSSCG00000035811
3vs1	gene21650	3361.37	4047.52	0.0142211	-0.267987	RPL24	XM_003132697	XM_003132697.3	ribosomal protein L24	ENSSSCG00000011952
3vs1	gene2802	10202.3	12285.3	0.000768782	-0.268041	EEF1G	XM_005660798	XM_005660798.3	eukaryotic translation elongation factor 1 gamma	ENSSSCG00000013064
3vs1	gene11884	1083.55	1304.85	0.0342384	-0.268116	ATPIF1	NM_001097486	NM_001097486.1	ATPase inhibitory factor 1	ENSSSCG00000027072
3vs1	gene28062	698.614	841.86	0.0482879	-0.269085	FUNDC2	NM_213743	NM_213743.1	FUN14 domain containing 2	ENSSSCG00000012817
3vs1	gene6892	4116.86	4963.68	0.0149437	-0.269865	RPS7	XM_005662783	XM_005662783.3	ribosomal protein S7
3vs1	gene6252	758.518	914.826	0.0486254	-0.270314	ELMOD3	XM_005655213	XM_005655213.2	ELMO domain containing 3, transcript variant X4	ENSSSCG00000008238
3vs1	gene7892	1846.85	2229.33	0.0263219	-0.271544	SMG5	XM_021089680	XM_021089680.1	SMG5, nonsense mediated mRNA decay factor, transcript variant X1	ENSSSCG00000006490
3vs1	gene17069	3172.03	3833.59	0.00722839	-0.273293	BZW2	XM_021102039	XM_021102039.1	basic leucine zipper and W2 domains 2, transcript variant X2	ENSSSCG00000023118
3vs1	gene6261	4113.38	4972.71	0.00430065	-0.273707	SUCLG1	XM_005655225	XM_005655225.2	succinate-CoA ligase alpha subunit, transcript variant X2	ENSSSCG00000008247
3vs1	gene1017	25162.2	30445.1	0.0211982	-0.274951	ZNF106	XM_021097187	XM_021097187.1	zinc finger protein 106, transcript variant X2	ENSSSCG00000004725
3vs1	gene8754	856.38	1036.58	0.018323	-0.27551	TOMM22	XM_003126016	XM_003126016.6	translocase of outer mitochondrial membrane 22
3vs1	gene1529	1319.89	1599.94	0.0158334	-0.277603	PPM1A	XM_021062341	XM_021062341.1	protein phosphatase, Mg2+/Mn2+ dependent 1A, transcript variant X7	ENSSSCG00000005084
3vs1	gene26177	1199.59	1455.85	0.0195719	-0.279322	PSMA7	NM_001243652	NM_001243652.1	proteasome subunit alpha 7	ENSSSCG00000033332
3vs1	gene12888	1375.09	1669.02	0.0212394	-0.279467	GMPR	XM_001929120	XM_001929120.7	guanosine monophosphate reductase, transcript variant X2	ENSSSCG00000001064
3vs1	gene14600	917.027	1114.04	0.0368698	-0.280769	PSMC1	NM_001244151	NM_001244151.1	proteasome 26S subunit, ATPase 1	ENSSSCG00000002433
3vs1	gene11704	801.33	974.052	0.0486195	-0.281602	ARHGEF10L	XM_021095432	XM_021095432.1	Rho guanine nucleotide exchange factor 10 like, transcript variant X2	ENSSSCG00000003486
3vs1	gene26131	1198.9	1458.55	0.0394672	-0.282813	RBM38	NM_001105312	NM_001105312.1	RNA binding motif protein 38	ENSSSCG00000007504
3vs1	gene4328	9235.34	11236.8	0.00922497	-0.28299	CDC34	XM_021084306	XM_021084306.1	cell division cycle 34	ENSSSCG00000039640
3vs1	gene21457	1250.71	1522.8	0.0388532	-0.283979	RPL35A	XM_003358773	XM_003358773.4	ribosomal protein L35a, transcript variant X1
3vs1	gene23390	973.064	1186.62	0.0201836	-0.286247	NDUFB8	NM_001144842	NM_001144842.2	NADH:ubiquinone oxidoreductase subunit B8	ENSSSCG00000006166
3vs1	gene5894	1101.53	1345.21	0.018607	-0.28832	PGP	XM_003481109	XM_003481109.4	phosphoglycolate phosphatase
3vs1	gene6412	1443.54	1763.05	0.0486622	-0.288463	UGP2	XM_021085835	XM_021085835.1	UDP-glucose pyrophosphorylase 2, transcript variant X1	ENSSSCG00000008368
3vs1	gene7099	2085.01	2550.54	0.0365105	-0.290744	NDUFB9	XM_013996497	XM_013996497.1	NADH:ubiquinone oxidoreductase subunit B9	ENSSSCG00000005976
3vs1	gene4929	540.903	661.893	0.0492159	-0.291228	PFDN1	XM_005661736	XM_005661736.2	prefoldin subunit 1	ENSSSCG00000038493
3vs1	gene6256	1303.01	1594.55	0.0165728	-0.291301	KCMF1	XM_021087303	XM_021087303.1	potassium channel modulatory factor 1
3vs1	gene21308	982.419	1202.33	0.031216	-0.291426	AP2M1	NM_001243644	NM_001243644.1	adaptor related protein complex 2 mu 1 subunit	ENSSSCG00000024437
3vs1	gene26796	34276.9	41951.4	0.00999976	-0.291481	PGAM2	XM_021078443	XM_021078443.1	phosphoglycerate mutase 2, transcript variant X2	ENSSSCG00000016720
3vs1	gene10078	1817.45	2225.28	0.00693254	-0.292075	FBXO31	XM_021093684	XM_021093684.1	F-box protein 31, transcript variant X2	ENSSSCG00000002654
3vs1	gene19400	532.144	651.662	0.0499391	-0.292307	MRPL45	XM_021067079	XM_021067079.1	mitochondrial ribosomal protein L45	ENSSSCG00000023263
3vs1	gene13702	1796.23	2200.53	0.0140658	-0.292879	IDH3A	XM_001927338	XM_001927338.5	isocitrate dehydrogenase 3 (NAD(+)) alpha	ENSSSCG00000032498
3vs1	gene10617	884.009	1083.01	0.0311085	-0.292908	TMEM147	XM_021097223	XM_021097223.1	transmembrane protein 147	ENSSSCG00000040012
3vs1	gene25971	1127.12	1381.64	0.0473765	-0.293748	DBNDD2	NM_001243672	NM_001243672.1	dysbindin domain containing 2	ENSSSCG00000033586
3vs1	gene2565	1085.88	1331.27	0.0433181	-0.293935	NDUFS8	XM_003122434	XM_003122434.3	NADH:ubiquinone oxidoreductase core subunit S8, transcript variant X1
3vs1	gene4897	1077.68	1323.63	0.0189509	-0.296564	ETF1	XM_003123975	XM_003123975.6	eukaryotic translation termination factor 1, transcript variant X1	ENSSSCG00000014337
3vs1	gene7285	2168.85	2665.88	0.0145633	-0.297686	PTDSS1	XM_021089073	XM_021089073.1	phosphatidylserine synthase 1, transcript variant X1	ENSSSCG00000006089
3vs1	gene2741	1803	2217.73	0.0212585	-0.29868	STIP1	XM_003353794	XM_003353794.4	stress induced phosphoprotein 1	ENSSSCG00000021620
3vs1	gene16525	735.175	905.38	0.0493019	-0.300437	TIMM8B	XM_003129849	XM_003129849.5	translocase of inner mitochondrial membrane 8 homolog B	ENSSSCG00000023599
3vs1	gene20961	1190.77	1468.72	0.0499749	-0.302662	PPP2R3A	XM_021069482	XM_021069482.1	protein phosphatase 2 regulatory subunit B''alpha, transcript variant X1	ENSSSCG00000033185
3vs1	gene15603	2408.37	2970.72	0.0151935	-0.302756	RPL34	XM_005666943	XM_005666943.3	ribosomal protein L34, transcript variant X1	ENSSSCG00000009146
3vs1	gene18123	2445.37	3021.47	0.00822434	-0.3052	ATP5C1	XM_021065003	XM_021065003.1	ATP synthase, H+ transporting, mitochondrial F1 complex, gamma polypeptide 1, transcript variant X2	ENSSSCG00000034086
3vs1	gene24462	4174.94	5161.07	0.00795583	-0.305914	EEF1B2	NM_001243524	NM_001243524.1	eukaryotic translation elongation factor 1 beta 2
3vs1	gene20827	743.037	918.6	0.0176553	-0.306002	EMC3	XM_003358517	XM_003358517.4	ER membrane protein complex subunit 3	ENSSSCG00000011562
3vs1	gene5914	3193.85	3948.59	0.00202126	-0.306042	RPL3L	XM_021086793	XM_021086793.1	ribosomal protein L3 like, transcript variant X4	ENSSSCG00000032657
3vs1	gene5465	1096.6	1355.89	0.0214215	-0.306199	SBDS	NM_001244393	NM_001244393.1	SBDS, ribosome maturation factor	ENSSSCG00000007732
3vs1	gene26154	2075.96	2573.34	0.0192026	-0.309869	ATP5E	XM_005673060	XM_005673060.3	ATP synthase, H+ transporting, mitochondrial F1 complex, epsilon subunit, transcript variant X1
3vs1	gene19205	3165.69	3930.2	0.00937484	-0.312083	DUSP3	XM_003131360	XM_003131360.6	dual specificity phosphatase 3	ENSSSCG00000020744
3vs1	gene26620	2423.73	3015.06	0.015256	-0.314957	CAPZA2	NM_001097455	NM_001097455.1	capping actin protein of muscle Z-line alpha subunit 2	ENSSSCG00000028113
3vs1	gene6193	2290.72	2852.26	0.0071195	-0.316306	COX5B	NM_001007517	NM_001007517.1	mitochondrial cytochrome c oxidase subunit Vb	ENSSSCG00000008195
3vs1	gene18257	4311.32	5368.83	0.0161831	-0.316478	RPL21	XM_003482864	XM_003482864.4	ribosomal protein L21, transcript variant X1	ENSSSCG00000009303
3vs1	gene10954	2657.15	3310.1	0.00735654	-0.316994	ARHGAP35	XM_021094622	XM_021094622.1	Rho GTPase activating protein 35	ENSSSCG00000003107
3vs1	gene4393	13494.5	16836.1	6.99441e-15	-0.319193	PDLIM7	XM_021084376	XM_021084376.1	PDZ and LIM domain 7, transcript variant X1	ENSSSCG00000040507
3vs1	gene3570	921.182	1150	0.0212384	-0.32007	NDUFA13	NM_001244646	NM_001244646.1	NADH:ubiquinone oxidoreductase subunit A13	ENSSSCG00000013936
3vs1	gene9583	991.523	1239.58	0.019037	-0.322133	EMG1	NM_001243478	NM_001243478.1	EMG1, N1-specific pseudouridine methyltransferase	ENSSSCG00000026812
3vs1	gene9280	917.752	1147.63	0.0194683	-0.322487	MDM2	XM_013997706	XM_013997706.2	MDM2 proto-oncogene, transcript variant X1
3vs1	gene22126	603.373	756.025	0.0350224	-0.325383	POLR3D	XM_001927933	XM_001927933.6	RNA polymerase III subunit D, transcript variant X2	ENSSSCG00000009622
3vs1	gene18220	478.902	600.286	0.0439345	-0.32592	SAP18	XM_021065443	XM_021065443.1	Sin3A associated protein 18	ENSSSCG00000028865
3vs1	gene8349	619.36	776.736	0.0482269	-0.326645	AMIGO1	XM_005663589	XM_005663589.3	adhesion molecule with Ig like domain 1, transcript variant X2	ENSSSCG00000034883
3vs1	gene3267	1900.65	2385.71	0.0044192	-0.327925	KCNJ11	XM_005661104	XM_005661104.3	potassium voltage-gated channel subfamily J member 11
3vs1	gene20219	1628.95	2046.87	0.015236	-0.329482	KCNJ12	XM_021068062	XM_021068062.1	potassium voltage-gated channel subfamily J member 12, transcript variant X1
3vs1	gene4423	1167.12	1468.86	0.011097	-0.331746	CLTB	XM_005661470	XM_005661470.3	clathrin light chain B, transcript variant X1	ENSSSCG00000014058
3vs1	gene11597	6225.35	7849.24	0.0100151	-0.334398	KIF1B	XM_021095325	XM_021095325.1	kinesin family member 1B, transcript variant X13	ENSSSCG00000003401
3vs1	gene8422	1730.43	2182.77	0.00398447	-0.335028	LRRC39	XM_021090152	XM_021090152.1	leucine rich repeat containing 39, transcript variant X1	ENSSSCG00000006867
3vs1	gene23035	48807.2	61632.5	5.9952e-15	-0.336598	MYOZ1	XM_021072180	XM_021072180.1	myozenin 1, transcript variant X2	ENSSSCG00000010304
3vs1	gene18971	1704.85	2163.36	0.00595888	-0.343627	ATP5H	XM_021066094	XM_021066094.1	ATP synthase, H+ transporting, mitochondrial Fo complex subunit D, transcript variant X2	ENSSSCG00000032166
3vs1	gene21497	1396.93	1772.98	0.00653525	-0.343913	FAM162A	NM_001243573	NM_001243573.1	family with sequence similarity 162 member A	ENSSSCG00000026990
3vs1	gene9128	6211.46	7910.33	0.0111204	-0.348806	ZC3H10	XM_003126269	XM_003126269.6	zinc finger CCCH-type containing 10, transcript variant X1	ENSSSCG00000033568
3vs1	gene24763	1288.85	1641.44	0.0370144	-0.34887	RAMP1	NM_214199	NM_214199.1	receptor activity modifying protein 1	ENSSSCG00000016331
3vs1	gene898	987.21	1257.7	0.0212507	-0.349363	MAPK6	XM_001925291	XM_001925291.5	mitogen-activated protein kinase 6, transcript variant X1	ENSSSCG00000004624
3vs1	gene10393	495.042	632.824	0.0482271	-0.354254	LOC100523672	XM_003126939	XM_003126939.5	heat shock factor protein 4, transcript variant X6
3vs1	gene8734	29137.5	37288.9	1.4988e-14	-0.355872	ATF4	XM_021090887	XM_021090887.1	activating transcription factor 4, transcript variant X1
3vs1	gene13526	4084.91	5234.02	0.00985271	-0.357618	APOBEC2	XM_001928899	XM_001928899.6	apolipoprotein B mRNA editing enzyme catalytic subunit 2	ENSSSCG00000036018
3vs1	gene15905	621.427	797.105	0.0198879	-0.359186	MRPL17	NM_001244380	NM_001244380.1	mitochondrial ribosomal protein L17
3vs1	gene7976	584.35	750.101	0.0246553	-0.360253	JTB	XM_021088474	XM_021088474.1	jumping translocation breakpoint, transcript variant X1	ENSSSCG00000006559
3vs1	gene10185	910.641	1169.75	0.0253395	-0.361243	CFDP1	XM_021093775	XM_021093775.1	craniofacial development protein 1	ENSSSCG00000033842
3vs1	gene17280	16358.3	21040.1	0.00458433	-0.363124	MYBPH	XM_005653726	XM_005653726.3	myosin binding protein H, transcript variant X2	ENSSSCG00000030681
3vs1	gene4992	2945.08	3790.46	0.0256567	-0.364065	DIAPH1	XM_021077845	XM_021077845.1	diaphanous related formin 1, transcript variant X2
3vs1	gene10652	1184.78	1529.37	0.0166342	-0.368318	COX7A1	NM_214411	NM_214411.1	cytochrome c oxidase polypeptide VIIa-muscle/heart
3vs1	gene5095	3930.41	5081.49	0.00826439	-0.37057	SYNPO	XM_021085030	XM_021085030.1	synaptopodin	ENSSSCG00000038453
3vs1	gene21152	835.513	1080.29	0.0488282	-0.370689	MLF1	XM_003358641	XM_003358641.5	myeloid leukemia factor 1
3vs1	gene18001	1318.85	1711.58	0.0247275	-0.37604	PHYH	XM_021063973	XM_021063973.1	phytanoyl-CoA 2-hydroxylase, transcript variant X1	ENSSSCG00000039244
3vs1	gene20086	2971.6	3858.56	0.00920097	-0.376824	DHRS7C	XM_005669235	XM_005669235.3	dehydrogenase/reductase 7C, transcript variant X2	ENSSSCG00000017996
3vs1	gene14070	547.032	715.178	0.0293022	-0.386677	FITM1	NM_001128470	NM_001128470.1	fat storage inducing transmembrane protein 1
3vs1	gene2982	1139.43	1493.04	0.0172584	-0.389936	SMTNL1	XM_021083035	XM_021083035.1	smoothelin like 1
3vs1	gene7968	343.941	456.014	0.035289	-0.406918	C4H1orf43	NM_001204390	NM_001204390.1	chromosome 4 C1orf43 homolog	ENSSSCG00000006554
3vs1	gene25185	1312.17	1762.97	0.0154445	-0.426049	BOD1	XM_003483847	XM_003483847.4	biorientation of chromosomes in cell division 1, transcript variant X1	ENSSSCG00000016982
3vs1	gene16518	16686.1	22556.1	0.0192356	-0.434875	CRYAB	XM_021062778	XM_021062778.1	crystallin alpha B, transcript variant X2	ENSSSCG00000036724
3vs1	gene13699	709.684	977.833	0.0464311	-0.46241	DNAJA4	NM_214339	NM_214339.1	DnaJ heat shock protein family (Hsp40) member A4	ENSSSCG00000037646
3vs1	gene13414	1280.24	1792.04	1.5423e-11	-0.485185	C7H6orf125	NM_001243451	NM_001243451.1	uncharacterized protein C6orf125 homolog	ENSSSCG00000030668
3vs1	gene7763	1142.27	1667.43	0.0190269	-0.545724	PEX19	XM_001928869	XM_001928869.5	peroxisomal biogenesis factor 19, transcript variant X1	ENSSSCG00000023091
3vs1	gene2278	361.606	533.157	0.0471549	-0.560141	SLC25A25	NM_001164510	NM_001164510.1	solute carrier family 25 member 25	ENSSSCG00000005636
3vs1	gene1086	350.693	539.267	0.048752	-0.620792	THBS1	NM_001244536	NM_001244536.1	thrombospondin 1	ENSSSCG00000004789
3vs1	gene23261	4213.97	6812.99	0.0356373	-0.693108	PPP1R3C	XM_005671280	XM_005671280.3	protein phosphatase 1 regulatory subunit 3C	ENSSSCG00000010464
3vs1	gene8550	240.894	413.034	0.0488016	-0.777864	CYR61	XM_001927740	XM_001927740.5	cysteine rich angiogenic inducer 61
3vs1	gene6044	227.157	409.083	0.0498141	-0.848704	SLC20A1	XM_021087022	XM_021087022.1	solute carrier family 20 member 1, transcript variant X1	ENSSSCG00000032288
3vs1	gene7088	1195.07	2397.21	0.0497973	-1.00426	TRIB1	XM_021088927	XM_021088927.1	tribbles pseudokinase 1, transcript variant X1	ENSSSCG00000038500
3vs1	gene20380	456.524	924.326	0.0487303	-1.01771	CSRNP1	XM_003132123	XM_003132123.4	cysteine and serine rich nuclear protein 1	ENSSSCG00000011264
3vs1	gene28132	67.4227	379.726	0.0486283	-2.49365	LOC100625207	XM_021080952	XM_021080952.1	probable ubiquitin carboxyl-terminal hydrolase FAF-X, transcript variant X1	ENSSSCG00000027046
3vs1	gene28138	120.946	841.857	0.03694	-2.79921	LOC100624149	XM_005657947	XM_005657947.3	eukaryotic translation initiation factor 2 subunit 3, transcript variant X2	ENSSSCG00000012178
3vs1	gene28129	123.434	923.151	0.0426706	-2.90283	LOC100624590	XM_013991065	XM_013991065.2	ATP-dependent RNA helicase DDX3X, transcript variant X2	ENSSSCG00000026430
4vs1	gene15725	129.092	24.0258	0.0198856	2.42574	SPP1	XM_005667005	XM_005667005.3	secreted phosphoprotein 1, transcript variant X3	ENSSSCG00000009216
4vs1	gene7680	3216.83	877.833	0.0382672	1.87362	HSPA6	NM_001123127	NM_001123127.1	heat shock protein family A (Hsp70) member 6
4vs1	gene23386	1548.85	570.751	0.0166643	1.44026	SCD	XM_021072070	XM_021072070.1	stearoyl-CoA desaturase, transcript variant X1	ENSSSCG00000010554
4vs1	gene15585	188.471	74.7249	0.0371901	1.33468	ELOVL6	XM_021100707	XM_021100707.1	ELOVL fatty acid elongase 6, transcript variant X3	ENSSSCG00000036236
4vs1	gene18785	1175.39	505.453	0.0220718	1.21749	FASN	NM_001099930	NM_001099930.1	fatty acid synthase	ENSSSCG00000029944
4vs1	gene10885	123.969	59.9863	0.0455701	1.04728	APOE	NM_214308	NM_214308.1	apolipoprotein E	ENSSSCG00000003088
4vs1	gene13298	3018.18	1462.33	0.0468538	1.04541	HSP70.2	NM_213766	NM_213766.1	heat shock protein 70.2
4vs1	gene13310	109.604	55.3387	0.0445564	0.985935	C4A	NM_001123089	NM_001123089.2	complement C4A (Rodgers blood group)	ENSSSCG00000001427
4vs1	gene13686	109.331	57.9839	0.04666	0.914977	ELOVL5	XM_021098831	XM_021098831.1	ELOVL fatty acid elongase 5, transcript variant X1
4vs1	gene15334	483.275	268.259	0.0224662	0.849219	FRAS1	XM_021100604	XM_021100604.1	Fraser extracellular matrix complex subunit 1, transcript variant X2	ENSSSCG00000008991
4vs1	gene28008	453.762	252.322	0.0161432	0.84667	BGN	XM_003135475	XM_003135475.5	biglycan, transcript variant X2
4vs1	gene20007	72.9033	40.7378	0.0440962	0.839616	CD68	NM_001291776	NM_001291776.1	CD68 molecule	ENSSSCG00000017956
4vs1	gene19472	5743.98	3215.96	1.21014e-13	0.836803	COL1A1	XM_021067153	XM_021067153.1	collagen type I alpha 1 chain, transcript variant X1	ENSSSCG00000034682;ENSSSCG00000036135
4vs1	gene7875	1332.75	763.902	0.0175117	0.802947	NES	XM_005663265	XM_005663265.3	nestin	ENSSSCG00000006474
4vs1	gene7142	760.644	461.29	0.011029	0.721547	COL14A1	XM_013996512	XM_013996512.2	collagen type XIV alpha 1 chain, transcript variant X1
4vs1	gene8623	326.696	202.776	0.049642	0.688066	FBLN1	XM_003125955	XM_003125955.6	fibulin 1, transcript variant X1	ENSSSCG00000000010
4vs1	gene16994	5097.33	3169.9	0	0.685302	COL1A2	NM_001243655	NM_001243655.1	collagen type I alpha 2 chain	ENSSSCG00000015326
4vs1	gene5083	196.779	122.376	0.0450533	0.685252	CSF1R	XM_003124100	XM_003124100.6	colony stimulating factor 1 receptor, transcript variant X1	ENSSSCG00000014441
4vs1	gene11911	228.571	142.552	0.0353879	0.681155	LAPTM5	XM_003356262	XM_003356262.5	lysosomal protein transmembrane 5	ENSSSCG00000025034
4vs1	gene24528	2035.53	1272.76	0.0102525	0.677445	FN1	XM_003133642	XM_003133642.5	fibronectin 1	ENSSSCG00000016174
4vs1	gene13343	698.235	436.848	0.0446546	0.676581	SLA-DQA1	XM_005665844	XM_005665844.3	MHC class II histocompatibility antigen SLA-DQA, transcript variant X1
4vs1	gene12437	515.664	322.822	0.0373033	0.675695	LOC100624077	XM_005658141	XM_005658141.3	endogenous retrovirus group V member 2 Env polyprotein, transcript variant X1	ENSSSCG00000031640
4vs1	gene5435	351.975	224.602	0.0434819	0.648102	ELN	XM_021085777	XM_021085777.1	elastin, transcript variant X6	ENSSSCG00000025858
4vs1	gene6685	713.398	463.179	0.0438707	0.623138	FOSL2	XM_021085708	XM_021085708.1	FOS like 2, AP-1 transcription factor subunit, transcript variant X1	ENSSSCG00000032527
4vs1	gene8086	263.785	172.463	0.043539	0.613079	ECM1	XM_021089909	XM_021089909.1	extracellular matrix protein 1, transcript variant X5	ENSSSCG00000026395;ENSSSCG00000029230
4vs1	gene9468	930.464	608.544	0.0101448	0.612588	EMP1	XM_021090848	XM_021090848.1	epithelial membrane protein 1, transcript variant X1	ENSSSCG00000036723
4vs1	gene2416	648.844	429.18	0.0346513	0.59629	COL5A1	NM_001014971	NM_001014971.1	collagen type V alpha 1 chain	ENSSSCG00000005751
4vs1	gene26055	375.629	251.599	0.0460008	0.578184	PTGIS	XM_005654247	XM_005654247.3	prostaglandin I2 synthase, transcript variant X1	ENSSSCG00000007463
4vs1	gene20957	4203.65	2819.55	0.0108418	0.576178	KY	XM_005669860	XM_005669860.3	kyphoscoliosis peptidase	ENSSSCG00000011646
4vs1	gene21587	1198.38	804.58	0.0100251	0.574779	CCDC80	XM_003132680	XM_003132680.4	coiled-coil domain containing 80	ENSSSCG00000011928
4vs1	gene19220	328.049	222.539	0.0475469	0.559855	VAT1	XM_005656949	XM_005656949.3	vesicle amine transport 1	ENSSSCG00000024059
4vs1	gene24339	11267	7662.21	0	0.556268	COL3A1	NM_001243297	NM_001243297.1	collagen type III alpha 1 chain	ENSSSCG00000016034
4vs1	gene4290	872.573	603.027	0.0458769	0.533053	MIDN	XM_021084261	XM_021084261.1	midnolin, transcript variant X2	ENSSSCG00000013432
4vs1	gene9581	742.124	512.973	0.0222324	0.532778	C1S	XM_021091133	XM_021091133.1	complement C1s, transcript variant X2
4vs1	gene11146	786.612	544.724	0.0474779	0.530127	MYADM	XM_021094908	XM_021094908.1	myeloid associated differentiation marker, transcript variant X2	ENSSSCG00000003253
4vs1	gene16639	1217.49	844.294	0.0220589	0.528087	THY1	XM_005667396	XM_005667396.3	Thy-1 cell surface antigen, transcript variant X1	ENSSSCG00000032330
4vs1	gene17961	2446.15	1707.63	0.00807565	0.518521	VIM	XM_005668106	XM_005668106.3	vimentin, transcript variant X1	ENSSSCG00000011033
4vs1	gene25338	8156.15	5727.95	0.00487968	0.509869	SPARC	NM_001031794	NM_001031794.1	secreted protein acidic and cysteine rich	ENSSSCG00000017082
4vs1	gene10972	670.936	475.693	0.0390506	0.496145	EHD2	XM_003355959	XM_003355959.4	EH domain containing 2, transcript variant X1	ENSSSCG00000023371
4vs1	gene835	1549.9	1109.14	0.015114	0.482739	ANXA2	XM_005659537	XM_005659537.2	annexin A2, transcript variant X1	ENSSSCG00000004578
4vs1	gene10461	968.106	693.392	0.024828	0.481494	MMP2	NM_214192	NM_214192.2	matrix metallopeptidase 2	ENSSSCG00000002829
4vs1	gene18867	1400.98	1014.44	0.0123658	0.465753	TIMP2	NM_001145985	NM_001145985.1	TIMP metallopeptidase inhibitor 2	ENSSSCG00000017164
4vs1	gene24340	802.041	583.111	0.035162	0.459906	COL5A2	XM_021074694	XM_021074694.1	collagen type V alpha 2 chain, transcript variant X1	ENSSSCG00000016035
4vs1	gene20382	120516	88198.5	0.0397178	0.450404	XIRP1	NM_001143928	NM_001143928.1	xin actin binding repeat containing 1	ENSSSCG00000034015
4vs1	gene5091	1769.15	1295.95	0.0104476	0.449045	CD74	XM_021080282	XM_021080282.1	CD74 molecule, transcript variant X3
4vs1	gene8219	884.574	651.553	0.0385112	0.441101	ATP1A1	XM_021088717	XM_021088717.1	ATPase Na+/K+ transporting subunit alpha 1, transcript variant X1	ENSSSCG00000006740
4vs1	gene21830	799.24	589.784	0.0359825	0.438441	APP	XM_005670305	XM_005670305.3	amyloid beta precursor protein, transcript variant X6	ENSSSCG00000012022
4vs1	gene21523	1395.78	1033.61	0.0277529	0.43338	FSTL1	XM_021070306	XM_021070306.1	follistatin like 1, transcript variant X1	ENSSSCG00000039426
4vs1	gene10129	812.2	602.412	0.0392469	0.431084	CDH13	NM_001109945	NM_001109945.1	cadherin 13	ENSSSCG00000002684
4vs1	gene22063	1361.28	1014.89	0.0438076	0.423634	LOC100623720	XM_021071094	XM_021071094.1	collagen alpha-1(VI) chain, transcript variant X1	ENSSSCG00000022506
4vs1	gene9948	741.305	552.889	0.043766	0.423078	LUM	NM_001243339	NM_001243339.1	lumican	ENSSSCG00000000916
4vs1	gene16238	905.12	676.369	0.0452028	0.4203	SERPINH1	NM_001244132	NM_001244132.1	serpin family H member 1	ENSSSCG00000039468
4vs1	gene27388	888.371	665.493	0.0365244	0.416738	MSN	XM_013986219	XM_013986219.2	moesin, transcript variant X1	ENSSSCG00000012365
4vs1	gene9629	958.67	721.047	0.0362581	0.41094	CD9	NM_214006	NM_214006.1	CD9 molecule	ENSSSCG00000022230
4vs1	gene2658	679.223	511.656	0.0486771	0.40871	CFL1	NM_001004043	NM_001004043.1	cofilin 1	ENSSSCG00000012974
4vs1	gene2979	1264.58	952.658	0.00969087	0.40863	SERPING1	XM_005660873	XM_005660873.3	serpin family G member 1, transcript variant X1	ENSSSCG00000013181
4vs1	gene20580	782.651	597.222	0.038866	0.390101	GNAI2	XM_021068546	XM_021068546.1	G protein subunit alpha i2, transcript variant X2
4vs1	gene25644	784.327	601.327	0.0442343	0.383306	CST3	NM_001044602	NM_001044602.1	cystatin C	ENSSSCG00000037360
4vs1	gene2500	2470.79	1901.88	0.0448306	0.377545	IGF2	XM_021080621	XM_021080621.1	insulin like growth factor 2, transcript variant X11	ENSSSCG00000035293
4vs1	gene28036	833.306	641.806	0.0441046	0.376709	FLNA	XM_021080738	XM_021080738.1	filamin A, transcript variant X15
4vs1	gene6221	10450.4	8054.5	2.59792e-14	0.375696	SMYD1	XM_021085617	XM_021085617.1	SET and MYND domain containing 1, transcript variant X1	ENSSSCG00000008215
4vs1	gene23183	1228.35	949.203	0.0470067	0.371931	CXCL12	XM_005671244	XM_005671244.3	C-X-C motif chemokine ligand 12, transcript variant X3	ENSSSCG00000034973
4vs1	gene23582	5724.37	4427.84	0.0383802	0.370513	BAG3	XM_021073458	XM_021073458.1	BCL2 associated athanogene 3
4vs1	gene15514	706.109	550.015	0.0451482	0.36042	ANXA5	XM_003129218	XM_003129218.5	annexin A5	ENSSSCG00000009097
4vs1	gene17700	2176.08	1698.64	0.0244942	0.357349	CAPN2	NM_001100188	NM_001100188.1	calpain 2	ENSSSCG00000029411
4vs1	gene8825	1821.25	1422.21	0.0201327	0.356803	TIMP3	XM_003126073	XM_003126073.6	TIMP metallopeptidase inhibitor 3	ENSSSCG00000031866
4vs1	gene7247	1297.16	1032.83	0.025973	0.328755	PABPC1	XM_001927747	XM_001927747.4	poly(A) binding protein cytoplasmic 1	ENSSSCG00000006063
4vs1	gene19251	2123.49	1697.94	0.0291924	0.322655	CAVIN1	XM_021066983	XM_021066983.1	caveolae associated protein 1	ENSSSCG00000035446
4vs1	gene686	13530.9	10856.9	0.0178129	0.317649	EEF1A1	XM_005654402	XM_005654402.3	eukaryotic translation elongation factor 1 alpha 1, transcript variant X1
4vs1	gene22226	3008.79	2427.93	0.0204648	0.309461	CTSB	XM_005657266	XM_005657266.3	cathepsin B, transcript variant X3	ENSSSCG00000023666
4vs1	gene11024	753.321	608.082	0.0495529	0.308997	NUCB1	XM_013998618	XM_013998618.2	nucleobindin 1, transcript variant X1	ENSSSCG00000003150
4vs1	gene24756	2354.8	1906.09	0.0387273	0.304989	COL6A3	XM_021075741	XM_021075741.1	collagen type VI alpha 3 chain	ENSSSCG00000027331
4vs1	gene18705	2833.33	2293.67	0.043912	0.304841	COL4A1	XM_021065910	XM_021065910.1	collagen type IV alpha 1 chain
4vs1	gene2803	6737.67	5529.31	0.0199263	0.285151	AHNAK	XM_013994215	XM_013994215.2	AHNAK nucleoprotein	ENSSSCG00000033010
4vs1	gene2711	1596.66	1320.66	0.0435034	0.273792	EHD1	XM_021082871	XM_021082871.1	EH domain containing 1	ENSSSCG00000013017
4vs1	gene17740	11016.4	9112.54	0.0389528	0.273726	CACNA1S	XM_021064504	XM_021064504.1	calcium voltage-gated channel subunit alpha1 S	ENSSSCG00000024784
4vs1	gene2121	8302.41	6923.7	0.0448235	0.261986	GSN	XR_002337470	XR_002337470.1	gelsolin, transcript variant X6	ENSSSCG00000037508
4vs1	gene16399	3551.14	2977.92	0.048394	0.253978	AMOTL1	XM_005667237	XM_005667237.3	angiomotin like 1, transcript variant X3	ENSSSCG00000014960
4vs1	gene6338	3331.73	2803.5	0.0461858	0.249039	DYSF	XM_013996042	XM_013996042.2	dysferlin	ENSSSCG00000008312
4vs1	gene8352	6722.42	5671.23	0.0434462	0.245319	SYPL2	XM_021090083	XM_021090083.1	synaptophysin like 2, transcript variant X1	ENSSSCG00000006829
4vs1	gene13616	6063.97	5116.89	0.0404348	0.244996	CLIC5	NM_001198923	NM_001198923.2	chloride intracellular channel 5	ENSSSCG00000037416
4vs1	gene13605	7113.24	6071.16	0.0468347	0.228534	HSP90AB1	XM_005666063	XM_005666063.2	heat shock protein 90 alpha family class B member 1, transcript variant X1	ENSSSCG00000001701
4vs1	gene23007	4869.82	4167.98	0.0340747	0.224521	PSAP	XM_021071890	XM_021071890.1	prosaposin, transcript variant X6	ENSSSCG00000010281
4vs1	gene12418	102873	88435.5	0.0249154	0.218162	PGM1	XM_021093573	XM_021093573.1	phosphoglucomutase 1, transcript variant X3	ENSSSCG00000003812
4vs1	gene11028	8409.14	7235.34	0.0455893	0.216898	GYS1	NM_001195508	NM_001195508.1	glycogen synthase 1	ENSSSCG00000003154
4vs1	gene10651	1624.12	1402.34	0.0491869	0.211817	CAPNS1	NM_214318	NM_214318.2	calpain small subunit 1	ENSSSCG00000030149
4vs1	gene3665	8731.64	7555.66	0.0390454	0.208694	TMEM38A	XM_021083580	XM_021083580.1	transmembrane protein 38A	ENSSSCG00000013864
4vs1	gene13939	157984	137142	0.0260324	0.204103	PKM	XM_021099115	XM_021099115.1	pyruvate kinase, muscle, transcript variant X9	ENSSSCG00000001930
4vs1	gene3796	5340.48	4644.43	0.0286179	0.201468	TECR	XM_021083691	XM_021083691.1	trans-2,3-enoyl-CoA reductase, transcript variant X2	ENSSSCG00000031299
4vs1	gene10576	32727.7	28713.7	0.0388639	0.188774	GPI	NM_214330	NM_214330.1	glucose-6-phosphate isomerase	ENSSSCG00000002873
4vs1	gene4193	29682.6	26980.8	0.0434315	0.137683	EEF2	XM_003354002	XM_003354002.5	eukaryotic translation elongation factor 2, transcript variant X1	ENSSSCG00000025675
4vs1	gene8734	31595	37284.3	0.043562	-0.23887	ATF4	XM_021090887	XM_021090887.1	activating transcription factor 4, transcript variant X1
4vs1	gene23977	9435.79	11426.5	0.0211895	-0.276165	SLC25A4	XM_003133345	XM_003133345.4	solute carrier family 25 member 4	ENSSSCG00000015790
4vs1	gene4544	2406.64	2943.37	0.0213014	-0.290448	COX7C	XM_013994967	XM_013994967.2	cytochrome c oxidase subunit VIIc, transcript variant X1
4vs1	gene13414	1438.02	1791.68	0.0366335	-0.317227	C7H6orf125	NM_001243451	NM_001243451.1	uncharacterized protein C6orf125 homolog	ENSSSCG00000030668
4vs1	gene20473	1213.17	1514.97	0.0344988	-0.320511	LRRC2	XM_021068202	XM_021068202.1	leucine rich repeat containing 2, transcript variant X3	ENSSSCG00000026945
4vs1	gene16867	1861.13	2335.25	0.0407469	-0.327401	ZC3H11A	XM_005656653	XM_005656653.2	zinc finger CCCH-type containing 11A, transcript variant X13	ENSSSCG00000028035
4vs1	gene21799	1327.85	1667.32	0.0363052	-0.328435	USP25	XM_021070825	XM_021070825.1	ubiquitin specific peptidase 25, transcript variant X4	ENSSSCG00000024623
4vs1	gene15686	4961.71	6297.22	0.0193414	-0.343879	PDLIM5	XM_021101756	XM_021101756.1	PDZ and LIM domain 5, transcript variant X10	ENSSSCG00000009192
4vs1	gene7259	1227.81	1564.85	0.0418886	-0.349928	COX6C	NM_001097473	NM_001097473.2	COX6C protein	ENSSSCG00000006070
4vs1	gene7099	1979.73	2549.49	0.0409056	-0.364903	NDUFB9	XM_013996497	XM_013996497.1	NADH:ubiquinone oxidoreductase subunit B9	ENSSSCG00000005976
4vs1	gene26631	4434	5794.26	0.0403153	-0.386014	PPP1R3A	XM_003360157	XM_003360157.4	protein phosphatase 1 regulatory subunit 3A	ENSSSCG00000016640
4vs1	gene3301	2106.75	2761.05	5.04667e-05	-0.390198	TEAD1	XM_021077005	XM_021077005.1	TEA domain transcription factor 1, transcript variant X7	ENSSSCG00000013399
4vs1	gene7558	1412.16	1852.69	0.0344744	-0.391713	PCMTD1	XM_021089409	XM_021089409.1	protein-L-isoaspartate (D-aspartate) O-methyltransferase domain containing 1, transcript variant X1	ENSSSCG00000006267
4vs1	gene12339	2176.17	2977.4	0.039683	-0.452262	NEXN	XM_021096442	XM_021096442.1	nexilin F-actin binding protein, transcript variant X4	ENSSSCG00000003768
4vs1	gene6489	651.991	904.965	0.0461686	-0.473008	ACYP2	XM_021088229	XM_021088229.1	acylphosphatase 2, transcript variant X3	ENSSSCG00000025224;ENSSSCG00000035426
4vs1	gene26589	371.847	527.342	0.0367073	-0.504028	NDUFA5	XM_003134727	XM_003134727.3	NADH:ubiquinone oxidoreductase subunit A5, transcript variant X1	ENSSSCG00000037869
4vs1	gene24182	20919.5	30328.4	0.0214982	-0.535822	XIRP2	XM_005671902	XM_005671902.2	xin actin binding repeat containing 2, transcript variant X1	ENSSSCG00000015917
4vs1	gene21110	1250.9	1858.68	0.0249466	-0.571305	MBNL1	XM_021069664	XM_021069664.1	muscleblind like splicing regulator 1, transcript variant X38	ENSSSCG00000011720
4vs1	gene6197	5315.34	8109.56	1.6284e-09	-0.609462	ANKRD23	NM_001315720	NM_001315720.1	ankyrin repeat domain 23	ENSSSCG00000008200
4vs1	gene16964	370.865	576.146	0.0347761	-0.635539	AKAP9	XM_021102183	XM_021102183.1	A-kinase anchoring protein 9, transcript variant X6	ENSSSCG00000015310
4vs1	gene20356	736.9	1173.31	0.00036242	-0.67105	GOLGA4	XM_005652395	XM_005652395.3	golgin A4	ENSSSCG00000011243
4vs1	gene3235	1183.28	2236.32	0.0477809	-0.918331	CSRP3	NM_001172368	NM_001172368.1	cysteine and glycine rich protein 3	ENSSSCG00000013354
4vs1	gene25834	196.82	378.882	0.0392501	-0.94487	MYH7B	XM_021077548	XM_021077548.1	myosin heavy chain 7B, transcript variant X2	ENSSSCG00000007288

## Sheet: List of DEGs
AARS
ABCF1
ABCF2
ACO2
ACTA1
ACTN3
ACYP2
ADCY2
ADCY9
ADSSL1
AGO4
AHCY
AHNAK
AK1
AKAP9
AKR1B1
AKT1S1
ALDOA
ALPK3
AMIGO1
AMOTL1
ANK1
ANK2
ANKRD23
ANXA2
ANXA5
ANXA6
AP2M1
APOBEC2
APOE
APP
ARAF
ARF1
ARHGAP35
ARHGEF10L
ARID5B
ARIH2
ARPC2
ASB16
ASB2
ASNA1
ATF4
ATG9A
ATN1
ATP1A1
ATP2A1
ATP5B
ATP5C1
ATP5D
ATP5E
ATP5F1
ATP5G1
ATP5G2
ATP5H
ATP5J2
ATP5L
ATP5O
ATP6V1E1
ATPIF1
BABAM1
BAG1
BAG3
BAG6
BANF1
BAP1
BCKDK
BCL2L13
BGN
BNIP3
BOD1
BTBD6
BTF3
BZW2
C14H10orf71
C1H15orf52
C1S
C2H11orf96
C3H7orf26
C4A
C4H1orf43
C7H6orf106
C7H6orf125
C9H1orf21
CACNA1S
CACNB1
CACNG1
CAMK2A
CAMTA2
CAND2
CAPN1
CAPN2
CAPNS1
CAPZA2
CAPZB
CARNS1
CASQ1
CASTOR2
CAVIN1
CCDC80
CCNYL1
CCT3
CCT7
CD163
CD68
CD74
CD9
CDC34
CDC37
CDH13
CDIP1
CENPB
CFDP1
CFL1
CHCHD10
CHD4
CHURC1
CKM
CLIC5
CLPTM1
CLTB
CMYA5
COL14A1
COL1A1
COL1A2
COL3A1
COL4A1
COL5A1
COL5A2
COL6A3
COPE
COPS3
COPS7A
COQ9
COX10
COX5B
COX6B
COX6C
COX7A1
COX7C
COX8H
CRAT
CRKL
CRYAB
CSDE1
CSF1R
CSNK2B
CSRNP1
CSRP3
CST3
CTDSP1
CTSB
CTSD
CUL4A
CXCL12
CYB5R1
CYR61
DBNDD2
DCAF6
DCN
DCTN1
DCTN4
DEDD
DENND4B
DES
DHRS7C
DIAPH1
DICER1
DNAJA4
DNAJB1
DNAJB6
DOT1L
DUSP26
DUSP3
DYNLRB1
DYRK1B
DYSF
E2F6
ECM1
ECSIT
EEF1A1
EEF1A2
EEF1B2
EEF1D
EEF1G
EEF2
EGLN1
EHD1
EHD2
EIF1
EIF1AY
EIF2S2
EIF3B
EIF3D
EIF3F
EIF3G
EIF3I
EIF4A2
EIF4B
EIF4G1
EIF4G2
EIF5
EIF5A
ELMOD3
ELN
ELOVL5
ELOVL6
EMC3
EMG1
EMP1
ENO1
ENO3
EPM2A
EPN1
EPN2
ETF1
EVI5L
FAM162A
FASN
FAU
FBLN1
FBXO31
FBXO32
FCGRT
FEM1A
FITM1
FKBP4
FKBP8
FLII
FLNA
FLOT1
FLOT2
FN1
FOSL2
FOXK2
FRAS1
FSTL1
FTH1
FUNDC2
FXR2
FYCO1
GABARAP
GAPDH
GARS
GATAD2A
GDI2
GGA1
GLUL
GMPR
GNAI2
GOLGA4
GOT2
GPD1
GPI
GPR157
GPS1
GRB10
GRK2
GSN
GYG1
GYS1
HADHA
HBS1L
HCN2
HDGF
HDLBP
HFE2
HIF1AN
HIKESHI
HOMER3
HOXD8
HR
HSF1
HSP70.2
HSP90AB1
HSPA6
HSPA8
HUWE1
IDH2
IDH3A
IGF2
IGFN1
ILK
IPO13
IPO7
IPO9
JAK1
JPH2
JTB
KARS
KCMF1
KCNJ11
KCNJ12
KCTD2
KEAP1
KIAA0100
KIAA0368
KIAA2013
KIF1B
KIF1C
KLHDC3
KLHL41
KPNA1
KY
LAMP1
LAPTM5
LARP1
LDHA
LIMK1
LMOD2
LOC100152722
LOC100156967
LOC100513133
LOC100523672
LOC100623720
LOC100624067
LOC100624077
LOC100624149
LOC100624329
LOC100624559
LOC100624590
LOC100625207
LOC100738684
LOC106508719
LOC110260073
LOC110260088
LOC110260979
LRRC2
LRRC20
LRRC28
LRRC39
LRRC42
LRRFIP1
LUM
MAF1
MAP1LC3B
MAP2K2
MAP4
MAP7D1
MAPK6
MAPKAPK2
MAPRE3
MAZ
MBD3
MBNL1
MDM2
MFN2
MIDN
MINOS1
MLF1
MLXIP
MMP2
MOB2
MPC1
MRPL17
MRPL28
MRPL37
MRPL45
MSN
MTOR
MYADM
MYBBP1A
MYBPC2
MYBPH
MYH7B
MYL1
MYLK2
MYLPF
MYO18B
MYOM1
MYOM2
MYOZ1
MYOZ3
NAA10
NAPA
NCOR2
NDST1
NDUFA13
NDUFA4
NDUFA5
NDUFA8
NDUFB10
NDUFB8
NDUFB9
NDUFS3
NDUFS8
NDUFV2
NEK7
NEK9
NES
NEURL1
NEXN
NFE2L1
NFIC
NFIX
NIPSNAP2
NPEPPS
NPLOC4
NRBP1
NRDC
NSD1
NSFL1C
NUCB1
NUDCD3
OGDH
OPTN
P2RX5
P4HB
PABPC1
PABPC4
PACS2
PACSIN3
PAIP1
PARD3
PARK7
PCBP1
PCBP2
PCMTD1
PDLIM5
PDLIM7
PEBP4
PEX19
PFDN1
PFKFB1
PFN1
PGAM2
PGM1
PGP
PHB
PHB2
PHKA1
PHKB
PHKG1
PHYH
PIGC
PINK1
PIP4K2B
PKM
PKNOX2
PLCL2
PLEC
PLEKHM2
POLDIP2
POLG
POLR1A
POLR3D
POMGNT1
PPDPF
PPM1A
PPP1R3A
PPP1R3C
PPP2R3A
PPP3CB
PPP3CC
PPP3R1
PRDX6
PRKAR2A
PRKCA
PROB1
PRPS1
PSAP
PSMA7
PSMB4
PSMB5
PSMB6
PSMC1
PSMC2
PSMC3
PSMC4
PSMC5
PSMD11
PSMD2
PTDSS1
PTGIS
PTK2
PTP4A3
PTPA
PTPN21
PUF60
PYGM
R3HDM2
RAB11B
RAB3GAP2
RAB7A
RABEP1
RABL6
RAC1
RACK1
RAD23A
RAF1
RALGAPA2
RAMP1
RAN
RAPGEF1
RBM38
REEP5
RHOBTB2
RILPL1
RNF10
RNF130
RNF14
RNPEPL1
RPL10
RPL10A
RPL11
RPL12
RPL13
RPL13A
RPL14
RPL17
RPL18A
RPL19
RPL21
RPL24
RPL26
RPL27
RPL29
RPL31
RPL32
RPL34
RPL35
RPL35A
RPL36
RPL37
RPL37A
RPL39
RPL3L
RPL4
RPL5
RPL6
RPL7A
RPL8
RPL9
RPLP0
RPLP2
RPS10
RPS11
RPS16
RPS18
RPS19
RPS2
RPS20
RPS21
RPS23
RPS25
RPS27A
RPS28
RPS3
RPS3A
RPS5
RPS6
RPS7
RPS8
RPSA
RRAGA
RTN2
RXRA
RYR1
SACS
SAMD4A
SAMM50
SAP18
SBDS
SCD
SCN1B
SCN4B
SCRIB
SEMA4D
SERPINF1
SERPING1
SERPINH1
SH3GLB1
SHISA4
SLA-DQA1
SLC16A5
SLC20A1
SLC25A11
SLC25A25
SLC25A3
SLC25A4
SLC37A4
SLC43A2
SMG5
SMTNL1
SMYD1
SNRPB
SNTA1
SNU13
SPARC
SPEG
SPP1
SQSTM1
SRL
SRPRA
SSRP1
STAU1
STIP1
STK25
STK40
STRADB
STRN4
STUB1
STX16
SUCLG1
SUPT6H
SVIL
SYNGR2
SYNPO
SYNPO2L
SYPL2
SZRD1
TCEA3
TEAD1
TEAD4
TECR
TESK1
TEX2
TEX261
TFEB
THBS1
THRA
THY1
TIMM8B
TIMP2
TIMP3
TLN2
TMEM147
TMEM259
TMEM266
TMEM38A
TMEM9B
TMOD4
TMSB4X
TNIP1
TNNC2
TNNI1
TNNI2
TNPO3
TOMM22
TPI1
TPM1
TPT1
TRIB1
TRIP12
TRPC4AP
TTN
TUBA4A
TUBA8
TUBGCP2
TXNDC15
UBA1
UBA52
UBAC1
UBAP2
UBB
UBE2D3
UBE2D4
UBE3B
UBQLN1
UBTD1
UBXN1
UBXN6
UGP2
ULK1
UQCR10
USF2
USP24
USP25
USP5
VAPA
VARS
VAT1
VCP
VDAC1
VDAC3
VIM
VLDLR
VPS4A
WDR1
WDTC1
WWP1
XIRP1
XIRP2
YBX1
YBX3
YWHAE
ZBTB47
ZC3H10
ZC3H11A
ZER1
ZNF106
ZNF358
ZNF628
ZNF768
ZRANB1
ZZEF1

## Sheet: List of DEGs after cut-off
ABCF2
ACTA1
ACTN3
ACYP2
ADCY9
AHCY
AKAP9
AKR1B1
AMIGO1
ANKRD23
ANXA2
ANXA5
ANXA6
APOBEC2
APOE
APP
ARAF
ARHGAP35
ARHGEF10L
ARID5B
ASNA1
ATF4
ATN1
ATP1A1
ATP2A1
ATP5C1
ATP5E
ATP5H
BAG3
BCKDK
BCL2L13
BGN
BNIP3
BOD1
BTBD6
C14H10orf71
C1H15orf52
C1S
C2H11orf96
C3H7orf26
C4A
C4H1orf43
C7H6orf125
CAPN2
CAPZA2
CASTOR2
CAVIN1
CCDC80
CCNYL1
CD163
CD68
CD74
CD9
CDH13
CENPB
CFDP1
CFL1
CLTB
CMYA5
COL14A1
COL1A1
COL1A2
COL3A1
COL4A1
COL5A1
COL5A2
COL6A3
COX10
COX5B
COX6C
COX7A1
CRYAB
CSF1R
CSRNP1
CSRP3
CST3
CTSB
CXCL12
CYR61
DBNDD2
DCN
DCTN1
DES
DHRS7C
DIAPH1
DNAJA4
DNAJB1
DOT1L
DUSP26
DUSP3
DYRK1B
E2F6
ECM1
EEF1A1
EEF1A2
EEF1B2
EHD2
EIF1AY
ELMOD3
ELN
ELOVL5
ELOVL6
EMC3
EMG1
EMP1
EPN1
EPN2
EVI5L
FAM162A
FASN
FBLN1
FBXO31
FBXO32
FEM1A
FITM1
FLNA
FN1
FOSL2
FRAS1
FSTL1
GATAD2A
GGA1
GNAI2
GOLGA4
GPR157
GRB10
GSN
HCN2
HIF1AN
HOMER3
HR
HSF1
HSP70.2
HSPA6
IDH2
IGF2
IGFN1
JTB
KCNJ11
KCNJ12
KEAP1
KIAA2013
KIF1B
KIF1C
KY
LAPTM5
LIMK1
LMOD2
LOC100152722
LOC100513133
LOC100523672
LOC100623720
LOC100624077
LOC100624149
LOC100624329
LOC100624590
LOC100625207
LOC100738684
LOC106508719
LOC110260979
LRRC2
LRRC20
LRRC39
LRRC42
LUM
MAP7D1
MAPK6
MAPKAPK2
MBD3
MBNL1
MDM2
MIDN
MLF1
MMP2
MOB2
MRPL17
MRPL37
MSN
MYADM
MYBPH
MYH7B
MYLK2
MYO18B
MYOZ1
NAA10
NCOR2
NDUFA13
NDUFA5
NDUFB9
NDUFS8
NES
NEURL1
NEXN
NFIX
NUCB1
PABPC1
PARD3
PCBP2
PCMTD1
PDLIM5
PDLIM7
PEBP4
PEX19
PGAM2
PGM1
PGP
PHYH
PKNOX2
PLEKHM2
POLG
POLR1A
POLR3D
POMGNT1
PPDPF
PPP1R3A
PPP1R3C
PPP2R3A
PRKAR2A
PRKCA
PRPS1
PTDSS1
PTGIS
PYGM
RAB11B
RABEP1
RALGAPA2
RAMP1
RBM38
REEP5
RHOBTB2
RILPL1
RNPEPL1
RPL21
RPL34
RPL3L
RXRA
SAP18
SBDS
SCD
SCN4B
SCRIB
SERPING1
SERPINH1
SHISA4
SLA-DQA1
SLC20A1
SLC25A25
SLC37A4
SLC43A2
SMTNL1
SMYD1
SPARC
SPEG
SPP1
STK40
STRN4
SYNPO
TEAD1
TEAD4
TFEB
THBS1
THY1
TIMM8B
TIMP2
TIMP3
TMEM266
TMSB4X
TNIP1
TNNI1
TRIB1
TUBA8
TUBGCP2
UBAC1
UBTD1
UBXN6
USP25
VARS
VAT1
VIM
VLDLR
WDTC1
XIRP1
XIRP2
ZBTB47
ZC3H10
ZC3H11A
ZNF358
ZNF628
ZZEF1
